# GRaphical footprint based Alignment-Free method (GRAFree) for reconstructing evolutionary Traits in Large-Scale Genomic Features

Aritra Mahapatra<sup>1</sup>, Jayanta Mukherjee<sup>2</sup>

Department of Computer Science and Engineering,  
Indian Institute of Technology, Kharagpur, India, 721302

1 [aritra.mhp@iitkgp.ac.in](mailto:aritra.mhp@iitkgp.ac.in)

2 [jay@cse.iitkgp.ac.in](mailto:jay@cse.iitkgp.ac.in)

## abstract

In our study, we attempt to extract novel features from mitochondrial genomic sequences reflecting their evolutionary traits by our proposed method GRAFree (GRaphical footprint based Alignment-Free method). These features are used to build a phylogenetic tree given a set of species from insect, fish, bird, and mammal. A novel distance measure in the feature space is proposed for the purpose of reflecting the proximity of these species in the evolutionary processes. The distance function is found to be a metric. We have proposed a three step technique to select a feature vector from the feature space. We have carried out variations of these selected feature vectors for generating multiple hypothesis of these trees and finally we used a consensus based tree merging algorithm to obtain the phylogeny. Experimentations were carried out with 157 species covering four different classes such as, Insecta, Actinopterygii, Aves, and Mammalia. We also introduce a measure of quality of the inferred tree especially when the reference tree is not present. The performance of the output tree can be measured at each clade by considering the presence of each species at the corresponding clade. GRAFree can be applied on any graphical representation of genome to reconstruct the phylogenetic tree. We apply our proposed distance function on the selected feature vectors for three naive methods of graphical representation of genome. The inferred tree reflects some accepted evolutionary traits with a high bootstrap support. This concludes that our proposed distance function can be applied to capture the evolutionary relationships of a large number of both close and distance species using graphical methods.

## 1 Introduction

2 In studying phylogeny of different species using molecular data, mostly mu-  
3 tations, insertion, and deletion of residues in various homologous segments  
4 of DNA sequences are observed by computational biologists[18], [27]. This  
5 approach is sensitive to the selection of segments (e.g. genes, coding seg-  
6 ments, etc.) of the sequence. Moreover, the homologous segments are very  
7 small portions (< 2%) of the whole genome [51]. The roles of majority

8 of the genome sequences ( $\approx 98\%$ ) are unknown. Hence those parts are  
9 considered as “*junk*” [15], [49].

10 The mitochondrial genomes (mtDNA) are relatively simpler than the  
11 whole genome. It consists of a limited number of genes, tRNAs, etc. More-  
12 over, the “*junk*” segments are negligible with respect to the length of the  
13 mtDNA (generally  $\approx 1\%$ ). Most importantly, mtDNA are haploid, in-  
14 herited maternally in most animals [12], and recombination is very rare  
15 event in it [16]. So the changes of mtDNA sequence occur mainly due to  
16 mutations.

17 There are various challenges in using mtDNA sequences in computation  
18 and analysis. During the evolution process the genes of mtDNA very often  
19 change their order within the mtDNA and also get fragmented [33], [22], [5], [2].  
20 This violates the collinearity of homologous regions very often [77]. The  
21 length of the mtDNA as well as the length of genes are also different for  
22 different species which makes it difficult to align the homologous regions.  
23 Apart from these facts, the complexity, versatility, and the huge length  
24 of the data make it difficult to develop any simple method in compara-  
25 tive genomics [46]. Conventional methods compute the distance between  
26 sequences through computationally intensive process of multiple sequence  
27 alignment [29], which remains a bottleneck in using whole genomic se-  
28 quences for constructing phylogeny [25]. As a result, there exist a few  
29 works which attempt to discover evolutionary features in the larger appar-  
30 ent non-homologous regions of the genomic sequences using alignment-free  
31 methods.

32 The existing alignment-free methods can be broadly categorized into  
33 four types:

- 34 1. **k-mer/word frequency based methods:** The comparison be-  
35 tween two sequences are derived by the variation of the frequency of  
36 optimized k-mer. Feature frequency profile (FFP) [62], [63], composi-  
37 tion vector (CV) [69], return time distribution (RTD) [30], frequency  
38 chaos game representation (FCGR) [28] [23]) used this method.
- 39 2. **Substring based methods:** The pairwise distances are measured  
40 by the average length of maximum common substrings of two se-  
41 quences, e.g., average common substring (ACS) [67], average common  
42 substring with k-mismatches (ACS-k) [35], mutation distance [24].
- 43 3. **Information theory based methods:** The alignment-free sequence  
44 comparison method become effective by inheriting different concepts  
45 from information theory like entropy, mutual information, etc. Base  
46 base correlation [43], Information correlation and partial information  
47 correlation (IC-PIC) [20], and Lempel-Ziv compress [50] proposed  
48 various information theory based methods to compare two sequences.
- 49 4. **Graphical representation based methods:** Here the DNA/amino  
50 acid sequences are represented in multidimensional space. The pair-  
51 wise distances are obtained by comparing the graphs. Iterated map  
52 (IM) [1] adopted this technique to compute the distance between two  
53 sequences.

54 Most of the methods have various limitations. They are not suitable  
55 to deal with a large number of taxa, and the size of the input sequences is  
56 also limited [6, 45, 7]. It is found that an online tool named Alfree [77] can  
57 accept the total length of all sequences up to two lakhs. Similarly another

58 online tool CVTree3 [55], [78] works on coding sections only. The offline  
59 version of CVTree [55], [78],  $D_2^*$  [59], [68] is a very expensive process with  
60 respect to both memory and time. More over, the genomic data often works  
61 better or increase support for smaller datasets. For the larger dataset of  
62 very diverge species the phylogenetic tree construction methods have often  
63 failed [54].

64 Due to these difficulties, conventional methods of phylogenetic recon-  
65 struction are restricted to working with whole genome sequences as well as  
66 large dataset. For the last three decades, several methods have been intro-  
67 duced to represent the DNA sequence mathematically (both numerically  
68 and graphically) [48]. It has been hypothesized that each species carries  
69 unique patterns over their DNA sequence which makes a species different  
70 from others [34]. Exploration of those distributions for unique characteri-  
71 zation is the key motivation behind the mathematical representation of a  
72 genome. There exist various representations of the large genome sequences  
73 through line graph by mapping the nucleotides to various numeric repre-  
74 sentations. Considering the genome sequences as the signal (called genomic  
75 signal), these methods analyze respective sequences using different signal  
76 processing techniques. Several techniques have been proposed to represent  
77 DNA sequences graphically in 2D space. One of the way to represent is by  
78 considering the structural groups of DNA sequences, such as purine ( $A, G$ )  
79 and pyrimidine ( $C, T$ ) [47], amino ( $A, C$ ) and keto ( $T, G$ ) [37], and strong  
80 H-bond ( $C, G$ ) and weak H-bond ( $A, T$ ) [21]. The graphical representation  
81 has inherent a serious limitation of overlapping paths which causes loss of  
82 information [56]. In some techniques, the sequence is represented as an  
83 entity in higher dimensions such as, in 3-D [57, 39, 9, 26, 42], 4-D [11],  
84 5-D [40], and 6-D [41]. The increase of dimension reduces the probability  
85 of occurrence of degeneracy, but it causes difficulty in visualization. In few  
86 schemes, like Worm Curve [58], DV-Curve [75], cell representation [71],  
87 etc., the DNA sequences are represented in a non-overlapping fashion.

88 GRAFree can be applied on any graphical method. GRAFree also lifts  
89 the loss of information due to overlapping paths by considering the coordi-  
90 nates of each nucleotide. In this study, we consider three sets of structural  
91 groups of nucleotides (purine, pyrimidine), (amino, keto), and (weak H-  
92 bond, strong H-bond) separately for representing DNA by a sequence of  
93 points in a 2-D integral coordinate space. This point set is called **Graph-**  
94 **ical Foot Print (GFP)** of a DNA sequence. We propose a technique for  
95 extracting features from GFPs and use them for constructing phylogenetic  
96 trees. As there are three different types of numerical representation of nu-  
97 cleotides, there are three different hypotheses for the phylogeny. Each of  
98 them is found to be statistically significant compared to a tree randomly  
99 generated. We also generate a consensus tree from these three hypotheses  
100 by applying a tree merging algorithm called COSPEDTree [3, 4].

101 Experimentations were carried out with a large dataset of total 157  
102 species from four different classes, namely, Insecta (insect), Actinopterygii  
103 (ray-finned fish), Aves (bird), and Mammalia (Mammal).

104 The contributions made in this work are highlighted below:

- 105 • Revisiting the concept of Graphical Foot Print (GFP), 2D represen-  
106 tation of DNA sequences, and introducing the concept of drift in  
107 GFP, which is found to be translation invariant for a sequence.
- 108 • Representation of a fragment of drift by a novel 5 dimensional de-  
109 scriptor. All the 5-D descriptors together represent a genotype char-

110 characteristic for a species.

111 • Proposed a new distance function to measure the dissimilarity among  
 112 species, and use the distance matrix for generating phylogenetic tree  
 113 by distance based methods such as UPGMA [64]. The distance func-  
 114 tion is proved to be a metric.

115 • Proposed a technique to select the value of the parameters involved  
 116 in computing the distance matrix.

## 117 1 Materials and Methods

### 118 Feature space

119 **Definition 1. Graphical Foot Print (GFP).**

120 Let a sequence,  $\mathcal{S} \in \Sigma^+$ ,  $\Sigma = \{A, T, G, C\}$ . For each combination  
 121 of Purine (R)/Pyrimidine (Y), Amino (M)/Keto (K), and Strong H-bond  
 122 (S)/Weak H-bond (W), the GFP of  $\mathcal{S}$ ,  $\phi(\mathcal{S})$ , is the locus of 2-D points in an  
 123 integral coordinate space, such that  $(x_i, y_i)$  is the coordinate of the alphabet  
 124  $s_i$ ,  $\forall s_i \in \mathcal{S}$ , for  $i = 1, 2, \dots, n$ , and  $x_0 = y_0 = 0$ .

125 Case-1: for Purine/Pyrimidine

$$\begin{aligned} x_i &= x_{i-1} + 1; && \text{if } s_i = G \\ &= x_{i-1} - 1; && \text{if } s_i = A \\ &= 0; && \text{otherwise} \\ y_i &= y_{i-1} + 1; && \text{if } s_i = C \\ &= y_{i-1} - 1; && \text{if } s_i = T \\ &= 0; && \text{otherwise} \end{aligned} \tag{1}$$

126 Case-2: for Strong H-bond/Weak H-bond

$$\begin{aligned} x_i &= x_{i-1} + 1; && \text{if } s_i = C \\ &= x_{i-1} - 1; && \text{if } s_i = G \\ &= 0; && \text{otherwise} \\ y_i &= y_{i-1} + 1; && \text{if } s_i = T \\ &= y_{i-1} - 1; && \text{if } s_i = A \\ &= 0; && \text{otherwise} \end{aligned} \tag{2}$$

127 Case-3: for Amino/Keto

$$\begin{aligned} x_i &= x_{i-1} + 1; && \text{if } s_i = A \\ &= x_{i-1} - 1; && \text{if } s_i = C \\ &= 0; && \text{otherwise} \\ y_i &= y_{i-1} + 1; && \text{if } s_i = T \\ &= y_{i-1} - 1; && \text{if } s_i = G \\ &= 0; && \text{otherwise} \end{aligned} \tag{3}$$

128 We denote GFPs of Case-1, Case-2 and Case-3, as GFP-RY ( $\Phi_{RY}$ ),  
 129 GFP-SW ( $\Phi_{SW}$ ) and GFP-MK ( $\Phi_{MK}$ ), respectively.

130 **Definition 2. Drift of GFP.**

131 Let  $\mathcal{S}$  be a DNA sequence and  $s_i$  be the alphabet ( $s_i \in \{A, T, G, C\}$ )  
 132 at the  $i^{\text{th}}$  position of  $\mathcal{S}$ . Let  $\phi_i(\mathcal{S})$  denote the corresponding  $(x_i, y_i)$  the  
 133 coordinate of  $s_i$  in  $\Phi(\mathcal{S})$ .

134 Then for length  $L$ , drift at the  $i^{\text{th}}$  position is defined as,

135  $\delta_i^{(L)} = \phi_{i+L}(\mathcal{S}) - \phi_i(\mathcal{S})$ , where  $(i + L) \leq |\mathcal{S}|$

136 Considering the drifts for every  $i^{\text{th}}$  location of the whole sequence, the  
 137 sequence of drifts is denoted by

138  $\Delta^{(L)} = [\delta_0^{(L)}, \delta_1^{(L)}, \delta_2^{(L)}, \delta_3^{(L)}, \dots, \delta_m^{(L)}]$ , where  $(m + L) = |\mathcal{S}|$

139 For GFP-RY (refer to Definition 1), an element  $(x_i, y_i)$  in  $\Delta_{RY}^{(L)}$  provides  
 140 excess numbers of  $G$  from  $A$  and  $C$  from  $T$  in segment of length  $L$  starting  
 141 from the  $i^{\text{th}}$  location, respectively. Similarly, in GFP-SW, they are the  
 142 excess numbers of  $C$  from  $G$  and  $T$  from  $A$  (represents as  $\Delta_{SW}^{(L)}$ ), and in  
 143 GFP-MK, they correspond to the excess numbers of  $A$  from  $C$  and  $T$  from  
 144  $G$  (represents as  $\Delta_{MK}^{(L)}$ ), respectively.

145 We also call the elements of  $\Delta^{(L)}$  as points, as they can be plotted on a  
 146 2-D coordinate system. We call this plot as the scatter plot of the drift se-  
 147 quence. Similarly, we get a scatter plot of a GFP. Compared to  $\Phi_i(\mathcal{S})$ ,  $\Delta^{(L)}$   
 148 is translation invariant as its set of points does not depend on the starting  
 149 point of the sequence. It has been observed that in many cases the scatter  
 150 plots of  $\Delta$  have similar structure for closely spaced species mentioned in  
 151 literature. In Fig. 1 we demonstrate the scatter plots of GFPs and drift  
 152 sequences of two species from each class namely, *Drepanotermes* sp. and  
 153 *Macroglyphotermes errator* from insects, *Bathygadus antrodes* and *Breg-*  
 154 *maceros nectabanus* from fishes, *Jacana jacana* and *Raphus cucullatus* from  
 155 birds, *Canis familiaris* and *Panthera tigris tigris* from mammals. It can be  
 156 observed that the species from same class (insect, fish, bird, or mammal)  
 157 have the similar pattern in their drift sequences which intuitively indicates  
 158 that the intraclass species are closer than the interclass species. It can also  
 159 be observed that differences between two GFPs get reflected in their respec-  
 160 tive drifts. It is noted that the GFPs of *Bathygadus antrodes*, *Bregmaceros*  
 161 *nectabanus*, and *Canis familiaris* (refer to Fig. 1 (c, d, g), respectively)  
 162 have the similar patterns, where as their drifts, shown in Fig. 1 (k, l, o),  
 163 respectively, are quite different.

164 We represent spatial distribution of these points of  $\Delta$  by an elliptical  
 165 model using a five dimensional feature descriptor:  $(\mu, \Lambda, \lambda, \theta)$ , where  $\mu =$   
 166  $(\mu_x, \mu_y)$  is the center of the coordinates,  $\Lambda$  and  $\lambda$  are major and minor  
 167 eigen values of the covariance matrix, and  $\theta$  is the angle formed by the  
 168 eigen vector corresponding to  $\Lambda$  with respect to the  $x$ -axis. We make  $\mathcal{F}$   
 169 number of non overlapping equal length fragments from  $\Delta$  and represent  
 170 each fragment using the five dimensional feature descriptor.

171 **Distance function and its properties**

172 For two sequences  $\mathcal{P}$  and  $\mathcal{Q}$  with the feature descriptors of  $i^{\text{th}}$  fragments  
 173  $(\mu_{\mathcal{P}_i}, \Lambda_{\mathcal{P}_i}, \lambda_{\mathcal{P}_i}, \theta_{\mathcal{P}_i})$  and  $(\mu_{\mathcal{Q}_i}, \Lambda_{\mathcal{Q}_i}, \lambda_{\mathcal{Q}_i}, \theta_{\mathcal{Q}_i})$ , where  $i \leq \mathcal{F}$ ,  $\mu_{\mathcal{P}_i} = (\mu_{x\mathcal{P}_i}, \mu_{y\mathcal{P}_i})$   
 174 and  $\mu_{\mathcal{Q}_i} = (\mu_{x\mathcal{Q}_i}, \mu_{y\mathcal{Q}_i})$ , we propose the following distance function be-  
 175 tween them,

176

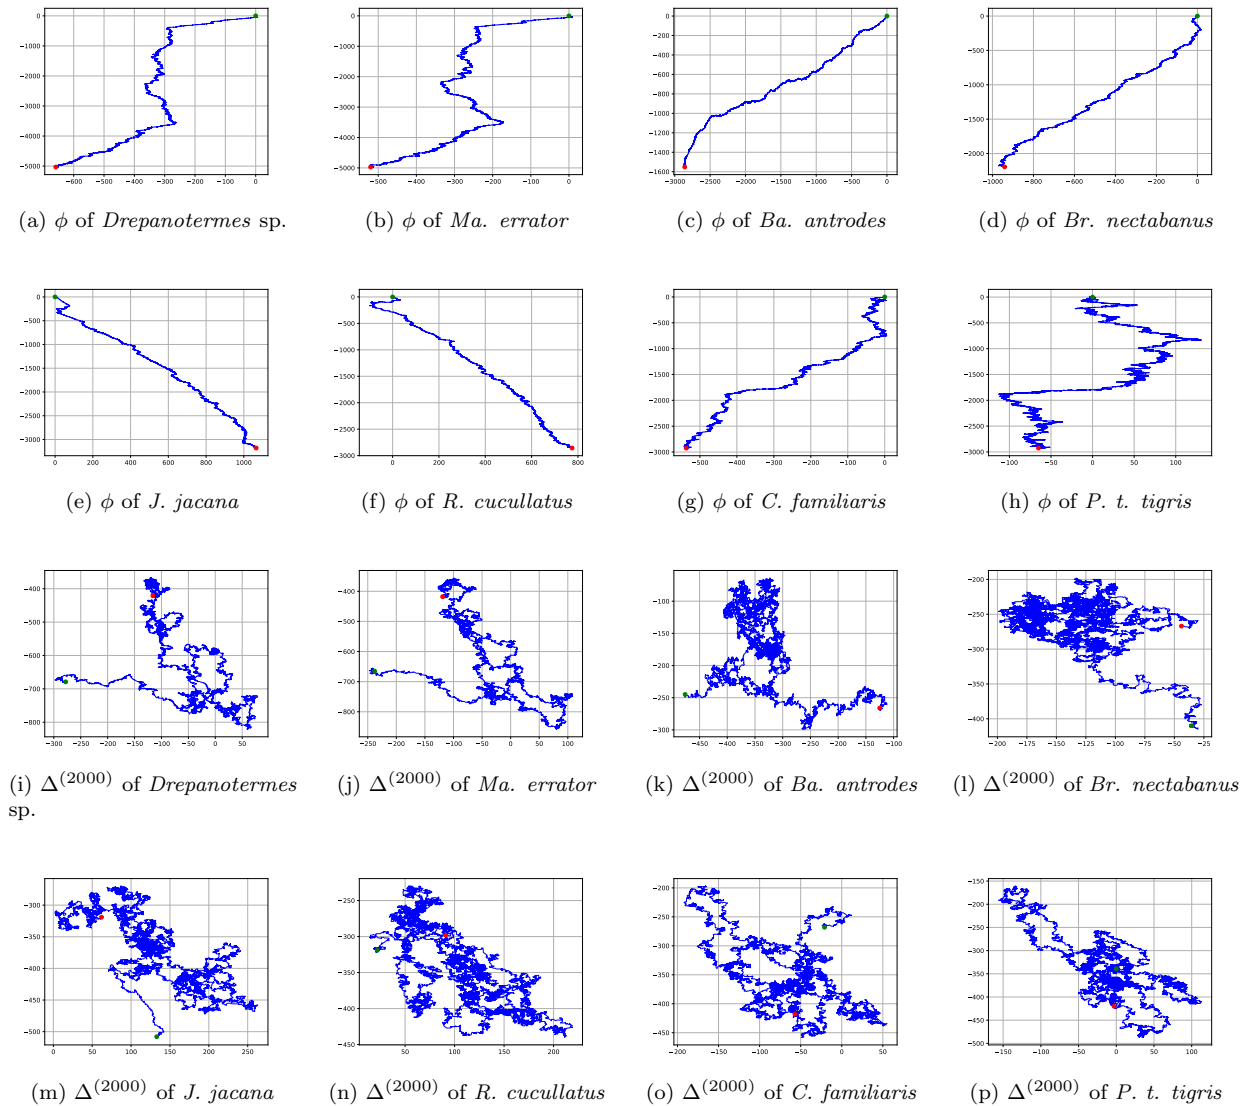

Figure 1:  $\Phi_{RY}$  and  $\Delta_{RY}$  of few species from our dataset. Fig. 1 (a, b) are the  $\Phi_{RY}$  generated from the insects namely, *Drepanotermes* sp. and *Macrognathotermes errator*, respectively. Fig. 1 (c, d) are the  $\Phi_{RY}$  generated from the fishes namely, *Bathygadus antrodes* and *Bregmaceros nectabanus*, respectively. Fig. 1 (e, f) are the  $\Phi_{RY}$  generated from the birds namely, *Jacana jacana* and *Raphus cucullatus*, respectively. Fig. 1 (g, h) are the  $\Phi_{RY}$  generated from the mammals namely, *Canis familiaris* and *Panthera tigris tigris*, respectively. Fig. 1 (i-p) are the  $\Delta_{RY}$  for  $L = 2000$  of the corresponding species. The green and red dots are the start and end points of the graph, respectively.

$$D(\mathcal{P}, \mathcal{Q}) = \frac{1}{\mathcal{F}} \sum_{i=1}^{\mathcal{F}} [\alpha \sqrt{\mu_{\mathcal{P}_i}^T \mu_{\mathcal{P}_i} + \mu_{\mathcal{Q}_i}^T \mu_{\mathcal{Q}_i} - 2\mu_{\mathcal{P}_i}^T \mu_{\mathcal{Q}_i} \cos(\theta_{\mathcal{P}_i} - \theta_{\mathcal{Q}_i})} + (1 - \alpha) \sqrt{(\Lambda_{\mathcal{P}_i} - \Lambda_{\mathcal{Q}_i})^2 + (\lambda_{\mathcal{P}_i} - \lambda_{\mathcal{Q}_i})^2}]$$

where,  $\alpha = [0, 1]$  (4)

177 **Lemma 1.** *The distance  $D$  between two sequences is a metric.*

178 *For any three sequences,  $\mathcal{P}, \mathcal{Q}$  and  $\mathcal{R}$ , we have*

179 1. *Non-negativity.*  $D(\mathcal{P}, \mathcal{Q}) \geq 0$

180 2. *Identity.*  $D(\mathcal{P}, \mathcal{Q}) = 0$  if and only if  $\mathcal{P} = \mathcal{Q}$

181 3. *Symmetry.*  $D(\mathcal{P}, \mathcal{Q}) = D(\mathcal{Q}, \mathcal{P})$

182 4. *Triangle inequality.*  $D(\mathcal{P}, \mathcal{Q}) + D(\mathcal{Q}, \mathcal{R}) \geq D(\mathcal{P}, \mathcal{R})$

183 *Proof.* The properties 1, 2 and 3 can be proved from the definition itself. Here we prove the property 4.

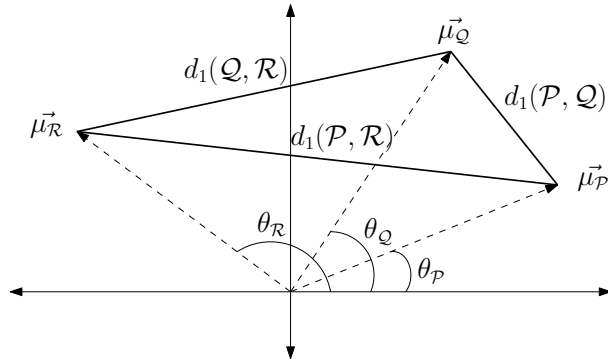

Figure 2: Computation of  $D(\mathcal{P}, \mathcal{Q})$

184

The distance between a single fragment of  $\mathcal{P}$  and  $\mathcal{Q}$  is,

$$\hat{D}(\mathcal{P}, \mathcal{Q}) = \alpha \sqrt{\mu_{\mathcal{P}_i}^T \mu_{\mathcal{P}_i} + \mu_{\mathcal{Q}_i}^T \mu_{\mathcal{Q}_i} - 2\mu_{\mathcal{P}_i}^T \mu_{\mathcal{Q}_i} \cos(\theta_{\mathcal{P}_i} - \theta_{\mathcal{Q}_i})} + (1 - \alpha) \sqrt{(\Lambda_{\mathcal{P}_i} - \Lambda_{\mathcal{Q}_i})^2 + (\lambda_{\mathcal{P}_i} - \lambda_{\mathcal{Q}_i})^2}$$

where,  $\alpha = [0, 1]$  (5)

The distance between a single fragment of  $\mathcal{Q}$  and  $\mathcal{R}$  is,

$$\hat{D}(\mathcal{Q}, \mathcal{R}) = \alpha \sqrt{\mu_{\mathcal{Q}_i}^T \mu_{\mathcal{Q}_i} + \mu_{\mathcal{R}_i}^T \mu_{\mathcal{R}_i} - 2\mu_{\mathcal{Q}_i}^T \mu_{\mathcal{R}_i} \cos(\theta_{\mathcal{Q}_i} - \theta_{\mathcal{R}_i})} + (1 - \alpha) \sqrt{(\Lambda_{\mathcal{Q}_i} - \Lambda_{\mathcal{R}_i})^2 + (\lambda_{\mathcal{Q}_i} - \lambda_{\mathcal{R}_i})^2}$$

where,  $\alpha = [0, 1]$  (6)

The distance between a single fragment of  $\mathcal{P}$  and  $\mathcal{R}$  is,

$$\hat{D}(\mathcal{P}, \mathcal{R}) = \alpha \sqrt{\mu_{\mathcal{P}_i}^T \mu_{\mathcal{P}_i} + \mu_{\mathcal{R}_i}^T \mu_{\mathcal{R}_i} - 2\mu_{\mathcal{P}_i}^T \mu_{\mathcal{R}_i} \cos(\theta_{\mathcal{P}_i} - \theta_{\mathcal{R}_i})} + (1 - \alpha) \sqrt{(\Lambda_{\mathcal{P}_i} - \Lambda_{\mathcal{R}_i})^2 + (\lambda_{\mathcal{P}_i} - \lambda_{\mathcal{R}_i})^2}$$

where,  $\alpha = [0, 1]$  (7)

185 Let,

$$186 \quad d_1(\mathcal{P}, \mathcal{Q}) = \sqrt{\mu_{\mathcal{P}}^T \mu_{\mathcal{P}} + \mu_{\mathcal{Q}}^T \mu_{\mathcal{Q}} - 2\mu_{\mathcal{P}}^T \mu_{\mathcal{Q}} \cos(\theta_{\mathcal{P}} - \theta_{\mathcal{Q}})}$$

$$187 \quad d_1(\mathcal{Q}, \mathcal{R}) = \sqrt{\mu_{\mathcal{Q}}^T \mu_{\mathcal{Q}} + \mu_{\mathcal{R}}^T \mu_{\mathcal{R}} - 2\mu_{\mathcal{Q}}^T \mu_{\mathcal{R}} \cos(\theta_{\mathcal{Q}} - \theta_{\mathcal{R}})}$$

$$188 \quad d_1(\mathcal{P}, \mathcal{R}) = \sqrt{\mu_{\mathcal{P}}^T \mu_{\mathcal{P}} + \mu_{\mathcal{R}}^T \mu_{\mathcal{R}} - 2\mu_{\mathcal{P}}^T \mu_{\mathcal{R}} \cos(\theta_{\mathcal{P}} - \theta_{\mathcal{R}})}$$

189 First, we prove,

$$d_1(P, Q) + d_1(Q, R) \geq d_1(P, R) \quad (8)$$

190 Fig. 2 represents the idea behind computing the distance between two  
 191 sequences. So, from the figure we observe that  $d_1(\mathcal{P}, \mathcal{Q})$ ,  $d_1(\mathcal{Q}, \mathcal{R})$  and  
 192  $d_1(\mathcal{P}, \mathcal{R})$  form a triangle. Using triangulation inequality Eq. (8) can be  
 193 proved.

194 For single fragment Let,

$$195 \quad d_2(P, Q) = \sqrt{(\Lambda_{\mathcal{P}} - \Lambda_{\mathcal{Q}})^2 + (\lambda_{\mathcal{P}} - \lambda_{\mathcal{Q}})^2}$$

$$196 \quad d_2(Q, R) = \sqrt{(\Lambda_{\mathcal{Q}} - \Lambda_{\mathcal{R}})^2 + (\lambda_{\mathcal{Q}} - \lambda_{\mathcal{R}})^2}$$

$$197 \quad d_2(P, R) = \sqrt{(\Lambda_{\mathcal{P}} - \Lambda_{\mathcal{R}})^2 + (\lambda_{\mathcal{P}} - \lambda_{\mathcal{R}})^2}$$

198 Similarly, it can be proved that,

$$d_2(P, Q) + d_2(Q, R) \geq d_2(P, R) \quad (9)$$

199 Hence, by combining Eq. (8) and Eq. (9) it can be said that,  $\widehat{D}(P, Q) +$   
 200  $\widehat{D}(Q, R) \geq \widehat{D}(P, R)$ .

201 Hence,  $\widehat{D}$  is a metric. As  $D$  is the linear combination of  $\widehat{D}$ . So  $D$  is  
 202 also be a metric.  $\square$

## 203 Taxon sampling and acquiring mitochondrial genome

204 We have selected various mitochondrial genome sequences sequenced by  
 205 various researchers such as insects are selected from [8], [65], ray-finned  
 206 fishes are selected from [61], [76], Aves data are selected from [19], [32], [53],  
 207 and Mammalian data are selected from [31], [73], [74] [52]. We ignore those  
 208 accession numbers which store some selected genes of mtDNA. Hence, we  
 209 have studied over 157 species of four different classes - Insecta (insect),  
 210 Actinopterygii (ray-finned fish), Aves (bird), and Mammalia (Mammal).  
 211 The selected data have been downloaded from the NCBI database<sup>1</sup>. The  
 212 average percentage of unrecognized nucleotide of all 157 mtDNA is 0.06%  
 213 which inferred that the data we selected for this study are quite good in  
 214 quality. Details of all the species are listed in Table 1.

Table 1: List of species

| Species name                   | Accession number | Sequence length | A%    | T%    | G%    | C%    | Unrecognized% | AT%   | GC%   | AT skew | GC skew |
|--------------------------------|------------------|-----------------|-------|-------|-------|-------|---------------|-------|-------|---------|---------|
| <i>Acinonyx jubatus</i>        | NC_005212.1      | 17047           | 33.10 | 27.53 | 13.58 | 25.79 | 0.00          | 60.63 | 39.37 | 0.09    | -0.31   |
| <i>Ailuropoda me-landeuca</i>  | EF196663.1       | 16747           | 31.83 | 29.36 | 14.92 | 23.87 | 0.03          | 61.19 | 38.78 | 0.04    | -0.23   |
| <i>Allantus luctifer</i>       | KJ713152.1       | 15418           | 42.02 | 39.11 | 7.54  | 11.33 | 0.00          | 81.13 | 18.87 | 0.04    | -0.20   |
| <i>Alopecoenas salamo-nis</i>  | KX902250.1       | 17141           | 30.93 | 24.25 | 13.32 | 31.50 | 0.00          | 55.18 | 44.82 | 0.12    | -0.41   |
| <i>Anas platyrhynchos</i>      | EU009397.1       | 16604           | 29.20 | 22.21 | 15.78 | 32.81 | 0.00          | 51.41 | 48.59 | 0.14    | -0.35   |
| <i>Apis mellifera syriaca</i>  | KP163643.1       | 15428           | 42.88 | 41.30 | 5.85  | 9.97  | 0.01          | 84.17 | 15.82 | 0.02    | -0.26   |
| <i>Arctocepalus forsteri</i>   | NC_004023.1      | 15413           | 33.23 | 25.91 | 14.11 | 26.75 | 0.00          | 59.14 | 40.86 | 0.12    | -0.31   |
| <i>Arctogadus glacialis</i>    | AM919429.1       | 16644           | 28.14 | 29.91 | 16.59 | 25.34 | 0.02          | 58.04 | 41.93 | -0.03   | -0.21   |
| <i>Ardea novae-hollan-diae</i> | NC_008551.1      | 17511           | 31.77 | 23.41 | 13.44 | 31.37 | 0.00          | 55.19 | 44.81 | 0.15    | -0.40   |
| <i>Boreogadus saida</i>        | NC_010121.1      | 16745           | 28.10 | 29.63 | 16.73 | 25.54 | 0.00          | 57.73 | 42.27 | -0.03   | -0.21   |
| <i>Nasutitermes triodiae</i>   | JX144940.1       | 15849           | 42.26 | 23.52 | 12.10 | 22.12 | 0.00          | 65.78 | 34.22 | 0.28    | -0.29   |
| <i>Neofelis nebulosa</i>       | NC_008450.1      | 16844           | 31.72 | 27.13 | 14.79 | 26.37 | 0.00          | 58.85 | 41.15 | 0.08    | -0.28   |

Continued on next page

<sup>1</sup>Website of NCBI database: <http://www.ncbi.nlm.nih.gov>



Table 1 – Continued from previous page

| Species name                               | Accession number | Sequence length | A%    | T%    | G%    | C%    | Unrecog-nized% | AT%   | GC%   | AT skew | GC skew |
|--------------------------------------------|------------------|-----------------|-------|-------|-------|-------|----------------|-------|-------|---------|---------|
| <i>Panthera tigris sumatrae</i>            | JF357970.1       | 17001           | 31.77 | 26.94 | 14.68 | 26.62 | 0.00           | 58.71 | 41.29 | 0.08    | -0.29   |
| <i>Lota lota</i>                           | AP004412.1       | 16527           | 28.37 | 27.59 | 16.32 | 27.72 | 0.00           | 55.96 | 44.04 | 0.01    | -0.26   |
| <i>Halichoerus grypus</i>                  | XT2004.1         | 16797           | 32.96 | 25.30 | 14.28 | 27.46 | 0.00           | 58.27 | 41.73 | 0.13    | -0.32   |
| <i>Didunculus stri-girostris</i>           | KX902245.1       | 17071           | 30.58 | 24.24 | 13.71 | 31.47 | 0.01           | 54.82 | 45.18 | 0.12    | -0.39   |
| <i>Megacrania alpheus adan</i>             | AB477471.1       | 17124           | 46.22 | 30.65 | 9.27  | 13.86 | 0.00           | 76.87 | 23.13 | 0.20    | -0.20   |
| <i>Platalea leucorodia</i>                 | KT901459.1       | 16846           | 31.12 | 24.26 | 13.84 | 30.78 | 0.00           | 55.38 | 44.62 | 0.12    | -0.38   |
| <i>Cephus sareptanus</i>                   | KM377624.1       | 15212           | 42.58 | 36.62 | 7.34  | 13.46 | 0.00           | 79.20 | 20.80 | 0.08    | -0.29   |
| <i>Izobrychus cinnamo-meus</i>             | KJ190959.1       | 18640           | 32.25 | 25.25 | 13.23 | 29.27 | 0.00           | 57.51 | 42.49 | 0.12    | -0.38   |
| <i>Melanogrammus aeglefinus</i>            | NC_007396.1      | 16585           | 28.50 | 30.49 | 16.33 | 24.67 | 0.00           | 58.99 | 41.01 | -0.03   | -0.20   |
| <i>Bathygadus antrodes</i>                 | AP008988.1       | 17596           | 27.59 | 34.94 | 18.78 | 18.69 | 0.00           | 62.53 | 37.47 | -0.12   | 0.00    |
| <i>Ursus malayanus</i>                     | EF196664.1       | 16783           | 31.17 | 27.87 | 15.36 | 25.59 | 0.00           | 59.05 | 40.95 | 0.06    | -0.25   |
| <i>Geotrygon violacea</i>                  | NC_015207.1      | 16864           | 30.46 | 24.58 | 13.86 | 31.08 | 0.02           | 55.04 | 44.94 | 0.11    | -0.38   |
| <i>Raphus cucullatus</i>                   | KX902236.1       | 17092           | 30.28 | 25.81 | 13.56 | 30.34 | 0.01           | 56.08 | 43.90 | 0.08    | -0.38   |
| <i>Columba janthina</i>                    | KM926619.1       | 17469           | 30.38 | 24.08 | 13.54 | 32.00 | 0.00           | 54.46 | 45.54 | 0.12    | -0.41   |
| <i>Nibea albiflora</i>                     | HQ890947.1       | 16499           | 26.40 | 25.88 | 16.91 | 30.81 | 0.00           | 52.28 | 47.72 | 0.01    | -0.29   |
| <i>Mephitis mephitis</i>                   | HM106332.1       | 16538           | 34.04 | 29.01 | 13.25 | 23.70 | 0.00           | 63.05 | 36.95 | 0.08    | -0.28   |
| <i>Trichosoma anthrac-inum</i>             | KT921411.1       | 15392           | 43.35 | 37.42 | 7.75  | 11.48 | 0.01           | 80.76 | 19.23 | 0.07    | -0.19   |
| <i>Collichthys niveatus</i>                | JN678726.1       | 16450           | 27.76 | 25.85 | 15.91 | 30.48 | 0.00           | 53.60 | 46.40 | 0.04    | -0.31   |
| <i>Pennahia argentata Japan</i>            | KC545800.1       | 16486           | 27.51 | 26.44 | 15.93 | 30.12 | 0.00           | 53.95 | 46.05 | 0.02    | -0.31   |
| <i>Lynx rufus</i>                          | NC_014456.1      | 17056           | 32.39 | 26.59 | 14.26 | 26.75 | 0.00           | 58.99 | 41.01 | 0.10    | -0.30   |
| <i>Panthera tigris amoyensis</i>           | NC_014770.1      | 17001           | 31.86 | 26.94 | 14.62 | 26.57 | 0.00           | 58.80 | 41.20 | 0.08    | -0.29   |
| <i>Prionailurus ben-galensis euphilura</i> | NC_016189.1      | 16990           | 33.03 | 27.41 | 13.54 | 26.02 | 0.00           | 60.44 | 39.56 | 0.09    | -0.32   |
| <i>Ciconia ciconia</i>                     | AB026818.1       | 17347           | 30.54 | 23.13 | 14.35 | 31.98 | 0.00           | 53.66 | 46.34 | 0.14    | -0.38   |
| <i>Streptopelia chinensis</i>              | KP273832.1       | 16966           | 30.09 | 23.92 | 13.93 | 32.06 | 0.00           | 54.01 | 45.99 | 0.11    | -0.39   |
| <i>Ichthyophaga relictus</i>               | KC760146.1       | 16586           | 30.62 | 24.38 | 14.07 | 30.93 | 0.00           | 55.00 | 45.00 | 0.11    | -0.37   |
| <i>Ectopistes migrato-rius</i>             | KX902243.1       | 16943           | 30.08 | 24.44 | 13.98 | 31.45 | 0.04           | 54.52 | 45.43 | 0.10    | -0.38   |
| <i>Pollachius pollachius</i>               | NC_015097.1      | 16539           | 27.68 | 29.23 | 17.15 | 25.94 | 0.00           | 56.91 | 43.09 | -0.03   | -0.20   |
| <i>Felis catus</i>                         | U20753.1         | 17009           | 32.59 | 27.08 | 14.15 | 26.19 | 0.00           | 59.67 | 40.33 | 0.09    | -0.30   |
| <i>Sclerophasma pare-sisensis</i>          | DQ241798.1       | 15500           | 41.59 | 33.47 | 10.57 | 14.36 | 0.00           | 75.06 | 24.94 | 0.11    | -0.15   |
| <i>Chalcophaps indica</i>                  | HM746789.1       | 15363           | 30.69 | 23.78 | 13.50 | 32.03 | 0.00           | 54.47 | 45.53 | 0.13    | -0.41   |
| <i>Eurymorhynchus pyg-meus</i>             | KP742478.1       | 16707           | 31.29 | 24.85 | 13.84 | 30.02 | 0.00           | 56.14 | 43.86 | 0.11    | -0.37   |
| <i>Sternula albifrons</i>                  | KT350612.1       | 16357           | 31.11 | 26.12 | 13.74 | 29.03 | 0.00           | 57.22 | 42.78 | 0.09    | -0.36   |
| <i>Orussus occidentalis</i>                | FJ478174.1       | 15947           | 38.75 | 37.46 | 8.23  | 15.55 | 0.00           | 76.21 | 23.79 | 0.02    | -0.31   |
| <i>Mastotermes dar-winiensis</i>           | JX144929.1       | 15487           | 39.63 | 28.39 | 11.99 | 19.99 | 0.00           | 68.02 | 31.98 | 0.17    | -0.25   |
| <i>Tenthredo tien-mushana</i>              | KR703581.1       | 14942           | 42.48 | 37.67 | 7.71  | 12.15 | 0.00           | 80.14 | 19.86 | 0.06    | -0.22   |
| <i>Ursus americanus</i>                    | AF303109.1       | 16841           | 31.14 | 28.26 | 15.52 | 25.08 | 0.00           | 59.40 | 40.60 | 0.05    | -0.24   |
| <i>Synthliboramphus an-tignus</i>          | AP009042.1       | 16730           | 31.10 | 24.75 | 13.56 | 30.60 | 0.00           | 55.85 | 44.15 | 0.11    | -0.39   |
| <i>Platalea minor</i>                      | EF455490.1       | 16918           | 31.13 | 24.24 | 13.97 | 30.66 | 0.00           | 55.37 | 44.63 | 0.12    | -0.37   |
| <i>Theragra finn-marchica</i>              | AM489718.1       | 16571           | 28.10 | 29.51 | 16.70 | 25.69 | 0.00           | 57.61 | 42.39 | -0.02   | -0.21   |
| <i>Blattella germanica</i>                 | EU854321.1       | 15025           | 39.19 | 35.36 | 10.44 | 15.01 | 0.00           | 74.56 | 25.44 | 0.05    | -0.18   |
| <i>Jacana jacana</i>                       | KJ631049.1       | 16975           | 31.88 | 24.35 | 13.15 | 30.62 | 0.00           | 56.23 | 43.77 | 0.13    | -0.40   |
| <i>Gallus gallus</i>                       | NC_001323.1      | 16775           | 30.25 | 23.79 | 13.51 | 32.45 | 0.00           | 54.04 | 45.96 | 0.12    | -0.41   |
| <i>Patagioenas fasciata</i>                | KX902239.1       | 16970           | 30.20 | 24.32 | 13.85 | 31.61 | 0.02           | 54.52 | 45.46 | 0.11    | -0.39   |
| <i>Goura cristata</i>                      | KX902242.1       | 17082           | 29.69 | 24.03 | 14.33 | 31.93 | 0.02           | 53.72 | 46.26 | 0.11    | -0.38   |
| <i>Reticulitermes santon-sensis</i>        | EF206315.1       | 16567           | 43.06 | 23.03 | 11.99 | 21.92 | 0.01           | 66.09 | 33.90 | 0.30    | -0.29   |
| <i>Collichthys lucida</i>                  | JN857362.1       | 16451           | 28.00 | 25.63 | 15.71 | 30.65 | 0.00           | 53.63 | 46.37 | 0.04    | -0.32   |
| <i>Schedorhinotermes breinli</i>           | JX144935.1       | 15864           | 43.89 | 22.09 | 11.66 | 22.37 | 0.00           | 65.97 | 34.03 | 0.33    | -0.31   |
| <i>Ursus ursinus</i>                       | EF196662.1       | 16817           | 30.83 | 27.47 | 15.76 | 25.95 | 0.00           | 58.29 | 41.71 | 0.06    | -0.24   |
| <i>Pennahia argentata China</i>            | HQ890946.1       | 16485           | 27.46 | 26.33 | 16.04 | 30.18 | 0.00           | 53.78 | 46.22 | 0.02    | -0.31   |
| <i>Ciconia boyciana</i>                    | AB026193.1       | 17622           | 30.85 | 22.87 | 14.29 | 31.99 | 0.00           | 53.72 | 46.28 | 0.15    | -0.38   |
| <i>Tamolania tamolana</i>                  | DQ241797.1       | 16055           | 39.84 | 35.43 | 9.45  | 15.28 | 0.00           | 75.27 | 24.73 | 0.06    | -0.24   |
| <i>Vanellus vanellus</i>                   | KM577158.1       | 16795           | 31.44 | 24.03 | 13.76 | 30.77 | 0.00           | 55.47 | 44.53 | 0.13    | -0.38   |
| <i>Panthera tigris altaica</i>             | HM185182.2       | 16995           | 31.86 | 26.94 | 14.57 | 26.62 | 0.01           | 58.79 | 41.19 | 0.08    | -0.29   |
| <i>Ursus thibetanus</i>                    | EF196661.1       | 16795           | 31.16 | 27.88 | 15.44 | 25.51 | 0.01           | 59.05 | 40.95 | 0.06    | -0.25   |
| <i>Gadus ogac</i>                          | NC_012323.1      | 15564           | 27.70 | 29.14 | 16.96 | 26.01 | 0.19           | 56.84 | 42.96 | -0.03   | -0.21   |
| <i>Micromesistius poutassou</i>            | FR751401.1       | 16573           | 27.42 | 27.10 | 17.23 | 28.24 | 0.00           | 54.53 | 45.47 | 0.01    | -0.24   |
| <i>Recurvirostra avosetta</i>              | KP757766.1       | 16897           | 31.72 | 23.59 | 13.56 | 31.13 | 0.00           | 55.31 | 44.69 | 0.15    | -0.39   |
| <i>Scolopax rusticola</i>                  | KM434134.1       | 16984           | 31.79 | 25.02 | 13.34 | 29.85 | 0.00           | 56.81 | 43.19 | 0.12    | -0.38   |
| <i>Panthera leo persica</i>                | JQ904290.1       | 16818           | 31.93 | 27.17 | 14.48 | 26.42 | 0.00           | 59.10 | 40.90 | 0.08    | -0.29   |
| <i>Columba joiyi</i>                       | KX902247.1       | 17179           | 30.48 | 24.05 | 13.71 | 31.75 | 0.02           | 54.53 | 45.46 | 0.12    | -0.40   |
| <i>Merluccius merluc-cius</i>              | NC_015120.1      | 17078           | 26.61 | 25.07 | 16.86 | 31.46 | 0.00           | 51.68 | 48.32 | 0.03    | -0.30   |
| <i>Chroicocephalus ridi-bundus</i>         | KM577662.1       | 16807           | 30.81 | 23.97 | 14.16 | 31.06 | 0.00           | 54.78 | 45.22 | 0.12    | -0.37   |
| <i>Microhodotermes via-tor</i>             | JX144931.1       | 15704           | 44.79 | 22.44 | 11.67 | 21.10 | 0.00           | 67.23 | 32.77 | 0.33    | -0.29   |
| <i>Cephus pygmeus</i>                      | KM377623.1       | 16145           | 42.93 | 36.89 | 7.23  | 12.95 | 0.00           | 79.82 | 20.18 | 0.08    | -0.28   |
| <i>Pollachius virens</i>                   | FR751399.1       | 16556           | 27.68 | 29.39 | 17.09 | 25.85 | 0.00           | 57.06 | 42.94 | -0.03   | -0.20   |
| <i>Vanhornia eucnem-i-darum</i>            | DQ302100.1       | 16574           | 43.49 | 36.62 | 6.67  | 13.18 | 0.04           | 80.11 | 19.85 | 0.09    | -0.33   |
| <i>Eupolyphaga sinensis</i>                | FJ830540.1       | 15553           | 40.42 | 31.61 | 10.49 | 17.47 | 0.00           | 72.04 | 27.96 | 0.12    | -0.25   |
| <i>Caloenas nicobarica</i>                 | KX902248.1       | 17090           | 30.09 | 24.97 | 14.27 | 30.67 | 0.00           | 55.06 | 44.94 | 0.09    | -0.36   |
| <i>Haematopus ater</i>                     | AY074886.2       | 16791           | 31.59 | 23.62 | 13.67 | 31.12 | 0.00           | 55.21 | 44.79 | 0.14    | -0.39   |
| <i>Neotermes insularis</i>                 | JX144933.1       | 15799           | 42.63 | 25.20 | 11.71 | 20.46 | 0.00           | 67.83 | 32.17 | 0.26    | -0.27   |
| <i>Zenaida macroura</i>                    | KX902235.1       | 17132           | 29.84 | 23.57 | 14.17 | 32.41 | 0.00           | 53.41 | 46.59 | 0.12    | -0.39   |

Continued on next page

Table 1 – Continued from previous page

| Species name                              | Accession number | Sequence length | A%    | T%    | G%    | C%    | Unrecog-nized% | AT%   | GC%   | AT skew | GC skew |
|-------------------------------------------|------------------|-----------------|-------|-------|-------|-------|----------------|-------|-------|---------|---------|
| <i>Hemiphaga novaezeelandiae</i>          | NC_013244.1      | 17264           | 30.97 | 23.92 | 13.21 | 31.89 | 0.01           | 54.89 | 45.11 | 0.13    | -0.41   |
| <i>Monocelliscampa pruni</i>              | JX566509.1       | 15169           | 40.87 | 36.34 | 8.31  | 14.48 | 0.00           | 77.22 | 22.78 | 0.06    | -0.27   |
| <i>Panthera uncia</i>                     | EF551004.1       | 16773           | 31.94 | 27.09 | 14.48 | 26.49 | 0.00           | 59.03 | 40.97 | 0.08    | -0.29   |
| <i>Brania canadensis</i>                  | NC_007011.1      | 16760           | 30.18 | 22.60 | 15.14 | 32.07 | 0.00           | 52.79 | 47.21 | 0.14    | -0.36   |
| <i>Caloenas maculata</i>                  | KX902249.1       | 17036           | 29.21 | 25.31 | 14.80 | 30.67 | 0.01           | 54.53 | 45.47 | 0.07    | -0.35   |
| <i>Leptotila verreauxi</i>                | NC_015190.1      | 17176           | 30.08 | 24.03 | 13.88 | 32.02 | 0.00           | 54.10 | 45.90 | 0.11    | -0.40   |
| <i>Zenaidura macroura</i>                 | HM640211.1       | 16781           | 29.71 | 23.58 | 14.21 | 32.48 | 0.02           | 53.29 | 46.69 | 0.12    | -0.39   |
| <i>Trachyrincus murrai</i>                | AF008990.1       | 16677           | 29.14 | 29.94 | 15.82 | 25.11 | 0.00           | 59.08 | 40.92 | -0.01   | -0.23   |
| <i>Arenaria interpres</i>                 | AY074885.2       | 16725           | 30.64 | 24.71 | 13.94 | 30.72 | 0.00           | 55.34 | 44.66 | 0.11    | -0.38   |
| <i>Asiemphtus rufocephalus</i>            | KR703582.1       | 14864           | 43.02 | 38.38 | 7.55  | 11.05 | 0.00           | 81.40 | 18.60 | 0.06    | -0.19   |
| <i>Chroicocephalus brun-nicephalus</i>    | JX155863.1       | 16769           | 30.70 | 24.03 | 14.16 | 31.11 | 0.00           | 54.73 | 45.27 | 0.12    | -0.37   |
| <i>Ursus arctos</i>                       | AF303110.1       | 17020           | 30.89 | 27.80 | 15.72 | 25.59 | 0.00           | 58.69 | 41.31 | 0.05    | -0.24   |
| <i>Phodilus badius</i>                    | KF961183.1       | 17086           | 30.41 | 21.36 | 14.28 | 33.66 | 0.29           | 51.77 | 47.94 | 0.17    | -0.40   |
| <i>Coelorrinchus kishinouyei</i>          | AP002929.1       | 15942           | 29.57 | 28.11 | 15.52 | 26.80 | 0.00           | 57.68 | 42.32 | 0.03    | -0.27   |
| <i>Otidiphaps nobilis</i>                 | KX902241.1       | 16570           | 29.66 | 24.68 | 13.65 | 30.46 | 1.56           | 54.34 | 44.10 | 0.09    | -0.38   |
| <i>Columba livia</i>                      | KJ722068.1       | 17235           | 30.22 | 24.05 | 13.97 | 31.76 | 0.00           | 54.27 | 45.73 | 0.11    | -0.39   |
| <i>Larimichthys polyac-tis</i>            | FJ618559.1       | 16470           | 27.55 | 25.00 | 16.18 | 31.27 | 0.00           | 52.55 | 47.45 | 0.05    | -0.32   |
| <i>Pezophaps solitaria</i>                | KX902238.1       | 16644           | 29.83 | 23.82 | 13.60 | 31.00 | 1.75           | 53.65 | 44.60 | 0.11    | -0.39   |
| <i>Gadus morhua kildinensis</i>           | AM489716.1       | 16654           | 28.06 | 29.56 | 16.79 | 25.59 | 0.00           | 57.62 | 42.38 | -0.03   | -0.21   |
| <i>Panthera tigris tigris</i>             | JF357968.1       | 16976           | 31.84 | 26.97 | 14.60 | 26.58 | 0.01           | 58.81 | 41.19 | 0.08    | -0.29   |
| <i>Panthera pardus</i>                    | NC_010641.1      | 16964           | 31.81 | 27.07 | 14.54 | 26.57 | 0.00           | 58.88 | 41.12 | 0.08    | -0.29   |
| <i>Panthera tigris cor-betti</i>          | JF357971.1       | 16602           | 31.85 | 26.88 | 14.64 | 26.62 | 0.01           | 58.73 | 41.26 | 0.08    | -0.29   |
| <i>Larus dominicanus</i>                  | AY293619.1       | 16701           | 30.54 | 24.45 | 14.13 | 30.88 | 0.00           | 54.98 | 45.02 | 0.11    | -0.37   |
| <i>Jacana spinosa</i>                     | KJ631048.1       | 17079           | 31.54 | 24.86 | 13.09 | 30.42 | 0.09           | 56.40 | 43.51 | 0.12    | -0.40   |
| <i>Gallinolumba luzonica</i>              | HM746790.1       | 15192           | 31.18 | 24.01 | 13.67 | 31.13 | 0.01           | 55.19 | 44.81 | 0.13    | -0.39   |
| <i>Threskiornis aethiopi-cus</i>          | GQ358927.1       | 16960           | 31.08 | 23.97 | 13.96 | 30.98 | 0.00           | 55.06 | 44.94 | 0.13    | -0.38   |
| <i>Columba rupestris</i>                  | KX902246.1       | 17201           | 30.19 | 23.86 | 13.77 | 31.93 | 0.24           | 54.05 | 45.71 | 0.12    | -0.40   |
| <i>Mitchthys miyu</i>                     | HM447240.1       | 16493           | 27.49 | 24.43 | 15.89 | 32.19 | 0.00           | 51.92 | 48.08 | 0.06    | -0.34   |
| <i>Nycticorax nycticorax</i>              | NC_015807.1      | 17829           | 32.37 | 23.53 | 14.13 | 29.96 | 0.00           | 55.90 | 44.10 | 0.16    | -0.36   |
| <i>Egretta euphotes</i>                   | KJ190949.1       | 20058           | 31.43 | 23.72 | 13.55 | 31.30 | 0.00           | 55.15 | 44.85 | 0.14    | -0.40   |
| <i>Heterotermes sp</i>                    | JX144936.1       | 16370           | 42.79 | 22.10 | 12.27 | 22.83 | 0.00           | 64.89 | 35.11 | 0.32    | -0.30   |
| <i>Vanellus cinereus</i>                  | KM404175.1       | 17074           | 31.63 | 23.53 | 13.77 | 31.08 | 0.00           | 55.15 | 44.85 | 0.15    | -0.39   |
| <i>Chroicocephalus saun-deri</i>          | JQ071443.1       | 16725           | 30.41 | 23.98 | 14.39 | 31.21 | 0.01           | 54.39 | 45.60 | 0.12    | -0.37   |
| <i>Eumetopias jubatus</i>                 | AJ428578.2       | 16638           | 33.58 | 25.63 | 13.69 | 27.11 | 0.00           | 59.21 | 40.79 | 0.13    | -0.33   |
| <i>Theragra chalcogramma panto-physin</i> | AB182305.1       | 16571           | 28.10 | 29.50 | 16.69 | 25.71 | 0.00           | 57.61 | 42.39 | -0.02   | -0.21   |
| <i>Cetornis globiceps</i>                 | KF751382.1       | 17137           | 28.07 | 28.13 | 15.57 | 28.23 | 0.00           | 56.21 | 43.79 | 0.00    | -0.29   |
| <i>Perga condei</i>                       | AY787816.1       | 13416           | 42.75 | 35.15 | 8.25  | 13.82 | 0.02           | 77.91 | 22.07 | 0.10    | -0.25   |
| <i>Egretta garzetta</i>                   | NC_023981.1      | 17361           | 31.50 | 23.23 | 13.47 | 31.80 | 0.00           | 54.73 | 45.27 | 0.15    | -0.40   |
| <i>Larimichthys crocea</i>                | EU339149.1       | 16466           | 27.55 | 25.46 | 16.30 | 30.69 | 0.00           | 53.01 | 46.99 | 0.04    | -0.31   |
| <i>Ursus maritimus</i>                    | AF303111.1       | 17017           | 30.87 | 27.77 | 15.82 | 25.54 | 0.00           | 58.64 | 41.36 | 0.05    | -0.24   |
| <i>Bahaba tapingenis</i>                  | JX232404.1       | 16500           | 27.55 | 25.15 | 15.90 | 31.41 | 0.00           | 52.70 | 47.30 | 0.05    | -0.33   |
| <i>Locusta migratoria</i>                 | X80245.1         | 15722           | 44.54 | 30.79 | 10.09 | 14.58 | 0.00           | 75.33 | 24.67 | 0.18    | -0.18   |
| <i>Drepanotermes sp</i>                   | JX144938.1       | 16542           | 42.45 | 24.76 | 12.02 | 20.77 | 0.00           | 67.20 | 32.80 | 0.26    | -0.27   |
| <i>Cephus cinctus</i>                     | FJ478173.1       | 19339           | 42.39 | 39.57 | 6.44  | 11.59 | 0.01           | 81.95 | 18.04 | 0.03    | -0.29   |
| <i>Macrotermes subhyal-inus</i>           | JX144937.1       | 16351           | 43.91 | 21.66 | 11.55 | 22.89 | 0.00           | 65.56 | 34.44 | 0.34    | -0.33   |
| <i>Stercorarius mac-cormicki</i>          | KM401546.1       | 16669           | 30.94 | 24.39 | 13.82 | 30.85 | 0.00           | 55.34 | 44.66 | 0.12    | -0.38   |
| <i>Canis lupus familiaris</i>             | NC_002008.4      | 16727           | 31.63 | 28.72 | 14.14 | 25.51 | 0.00           | 60.35 | 39.65 | 0.05    | -0.29   |
| <i>Niteba coibor</i>                      | KM373207.1       | 16509           | 26.91 | 25.40 | 16.32 | 31.37 | 0.00           | 52.30 | 47.70 | 0.03    | -0.32   |
| <i>Manis tetradactyla</i>                 | NC_004027.1      | 16571           | 33.31 | 29.75 | 13.73 | 23.21 | 0.00           | 63.06 | 36.94 | 0.06    | -0.26   |
| <i>Bregmaceros necta-banus</i>            | AP004411.1       | 16030           | 28.62 | 31.15 | 14.93 | 25.28 | 0.01           | 59.78 | 40.22 | -0.04   | -0.26   |
| <i>Parotermes adamsoni</i>                | JX144930.1       | 16039           | 42.76 | 24.05 | 11.90 | 21.29 | 0.00           | 66.82 | 33.18 | 0.28    | -0.28   |
| <i>Gallinago stenura</i>                  | KY056596.1       | 16899           | 32.21 | 26.14 | 12.88 | 28.77 | 0.00           | 58.35 | 41.65 | 0.10    | -0.38   |
| <i>Parapristipoma trilin-eatum</i>        | NC_009857.1      | 16546           | 27.99 | 26.89 | 16.57 | 28.54 | 0.00           | 54.88 | 45.12 | 0.02    | -0.27   |
| <i>Zootermopsis angusticollis</i>         | JX144932.1       | 15483           | 46.08 | 23.32 | 10.70 | 19.91 | 0.00           | 69.40 | 30.60 | 0.33    | -0.30   |
| <i>Dendrophysa russelli</i>               | JQ728562.1       | 16626           | 27.28 | 26.12 | 16.20 | 30.40 | 0.00           | 53.40 | 46.60 | 0.02    | -0.30   |
| <i>Ascalopteryx appendic-ulatus</i>       | FJ171324.1       | 15877           | 40.34 | 35.23 | 9.70  | 14.73 | 0.00           | 75.57 | 24.43 | 0.07    | -0.21   |
| <i>Macrognathotermes errator</i>          | JX144939.1       | 16330           | 42.33 | 24.49 | 11.88 | 21.30 | 0.00           | 66.82 | 33.18 | 0.27    | -0.28   |
| <i>Turtur tympanistria</i>                | HM746793.1       | 15557           | 30.44 | 23.87 | 13.70 | 31.99 | 0.00           | 54.32 | 45.68 | 0.12    | -0.40   |
| <i>Nipponia nippon</i>                    | AB104902.1       | 16732           | 30.44 | 23.48 | 14.27 | 31.81 | 0.00           | 53.92 | 46.08 | 0.13    | -0.38   |
| <i>Canis familiaris</i>                   | U96639.2         | 16727           | 31.63 | 28.72 | 14.14 | 25.51 | 0.00           | 60.35 | 39.65 | 0.05    | -0.29   |
| <i>Vespa bicolor</i>                      | KJ735511.1       | 16937           | 40.74 | 40.98 | 5.47  | 12.81 | 0.00           | 81.72 | 18.28 | 0.00    | -0.40   |
| <i>Pterocles gutturalis</i>               | KX902237.1       | 15637           | 29.31 | 25.19 | 13.19 | 27.18 | 5.14           | 54.50 | 40.37 | 0.08    | -0.35   |
| <i>Squalogadus modifica-tus</i>           | AP008989.1       | 16550           | 29.35 | 29.12 | 15.35 | 26.19 | 0.00           | 58.47 | 41.53 | 0.00    | -0.26   |
| <i>Diadegma semi-clausum</i>              | EU871947.1       | 18728           | 44.08 | 43.33 | 5.05  | 7.54  | 0.00           | 87.41 | 12.59 | 0.01    | -0.20   |
| <i>Phoca vitulina</i>                     | X63726.1         | 16826           | 32.98 | 25.30 | 14.28 | 27.43 | 0.00           | 58.28 | 41.72 | 0.13    | -0.32   |
| <i>Ventrifossa garmani</i>                | AF008991.1       | 17230           | 28.17 | 27.80 | 15.85 | 28.18 | 0.00           | 55.97 | 44.03 | 0.01    | -0.28   |
| <i>Geopelia striata</i>                   | HM746791.1       | 15859           | 30.59 | 23.63 | 13.89 | 31.88 | 0.01           | 54.22 | 45.77 | 0.13    | -0.39   |
| <i>Coptotermes lacteus</i>                | JX144934.1       | 16326           | 42.94 | 21.46 | 12.07 | 23.53 | 0.00           | 64.40 | 35.60 | 0.33    | -0.32   |
| <i>Cryptocercus relictus</i>              | JX144941.1       | 15373           | 45.34 | 28.15 | 10.13 | 16.32 | 0.05           | 73.49 | 26.46 | 0.23    | -0.23   |
| <i>Periplaneta fuliginosa</i>             | AB126004.1       | 14996           | 42.13 | 33.02 | 10.35 | 14.50 | 0.00           | 75.15 | 24.85 | 0.12    | -0.17   |
| <i>Puma concolor</i>                      | NC_016470.1      | 17153           | 32.90 | 27.31 | 13.81 | 25.98 | 0.00           | 60.21 | 39.79 | 0.09    | -0.31   |
| <i>Sardinops melanostic-tus</i>           | NC_002616.1      | 16881           | 25.32 | 25.98 | 20.34 | 28.35 | 0.00           | 51.31 | 48.69 | -0.01   | -0.16   |
| <i>Tremarctos ornatus</i>                 | EF196665.1       | 16766           | 31.29 | 27.34 | 15.42 | 25.93 | 0.02           | 58.62 | 41.35 | 0.07    | -0.25   |
| <i>Larus crassirostris</i>                | KM507782.1       | 16746           | 30.62 | 24.34 | 14.13 | 30.91 | 0.00           | 54.96 | 45.04 | 0.11    | -0.37   |

## 216 Data acquisition

217 We have developed a python based web scraper which can download the  
218 whole genome sequences, gene, and amino acid sequences (from the NCBI  
219 database server) by specifying either the accession numbers of the target  
220 species, or the name of a particular gene. In the former case, the whole  
221 genome sequences, different gene and amino acid sequences of the query  
222 species are downloaded. In the second case, all of the homologs of the  
223 query gene are extracted from the server. The web scraper extracts infor-  
224 mation from the NCBI data repository using *Entrez Global Query Cross-*  
225 *Database Search System*<sup>2</sup>. Entrez is a primary text search and retrieval  
226 system of NCBI database. The search system provides nine e-utilities, out  
227 of which “ESearch”, “ELink”, and “EFetch” have been used in our tool.  
228 From the downloaded items we consider only the mitochondrial genome  
229 sequences used in the subsequent analysis. Accession numbers of the indi-  
230 vidual species used in the current study are listed in Table 1.

## 231 Phylogenetic inference

232 We apply the proposed distance measure (refer to Eq. (4)) over 157 selected  
233 species from four classes to compute pairwise distances between them with  
234 different values of length,  $L$  (from 50 to 5000),  $\mathcal{F}$  (from 1 to 200), and  
235  $\alpha$  [0,1]. We compute all the feature sets separately for GFP-RY, GFP-  
236 SW, and GFP-MK (refer to Eq. (1), (2), (3), respectively). By applying  
237 Unweighted Pair Group Method with Arithmetic Mean (UPGMA) [64] over  
238 these distance matrices, we get the phylogenetic tree for each such case.  
239 The inferred phylogenetic trees for GFP-RY, GFP-SW, and GFP-MK are  
240 represented as  $\mathcal{T}_{RY}$ ,  $\mathcal{T}_{SW}$ , and  $\mathcal{T}_{MK}$ , respectively.

241 Finally, given  $L$ ,  $\mathcal{F}$ , and  $\alpha$ , we get three phylogenetic trees for GFP-RY,  
242 GFP-SW, and GFP-MK,  $\mathcal{T}_{RY}$ ,  $\mathcal{T}_{SW}$ , and  $\mathcal{T}_{MK}$ , respectively. These trees  
243 are combined following a consensus tree merging algorithm (COSPEDTree-  
244 II [4]) and get  $\mathcal{T}$ .

## 245 Selecting parameter values

246 We apply following three step technique to select the  $L$ ,  $\mathcal{F}$ , and  $\alpha$ .

- 247 1. Selecting the value of  $L$  using Shannon entropy of the sequence of  
248 each species.
- 249 2. Considering the intraclass variances and interclass distances of the  
250 features of each species to select the value of  $\mathcal{F}$ .
- 251 3. By considering the same for the pairwise distances we select the value  
252 of  $\alpha$ .

253 It is empirically noticed that the selection criteria we proposed derive the  
254 trees  $\mathcal{T}_{RY}$ ,  $\mathcal{T}_{SW}$ , and  $\mathcal{T}_{MK}$  infer better clades with the four different classes  
255 of species.

---

<sup>2</sup>Website of “NCBI Help Manual”:  
<http://www.ncbi.nlm.nih.gov/books/NBK3831/>

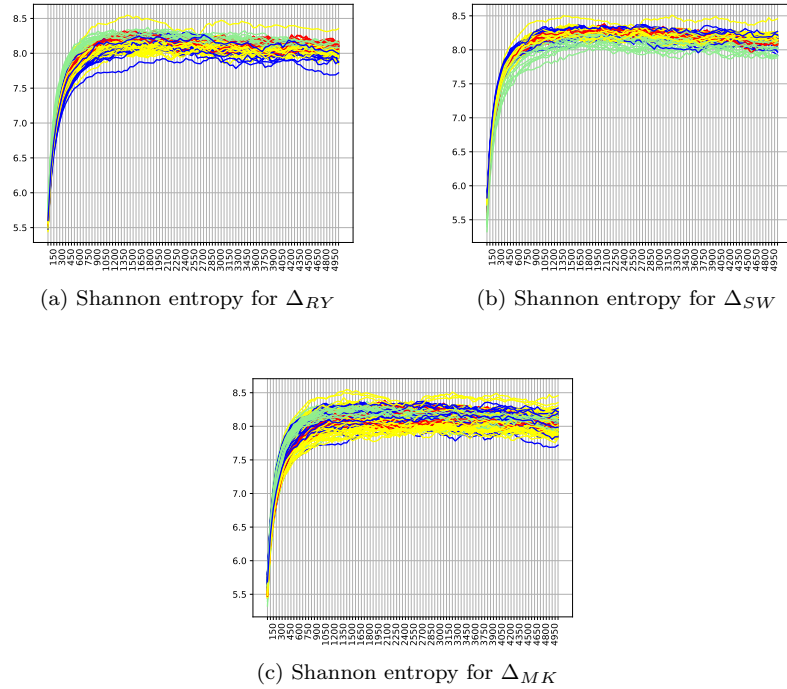

Figure 3: Shannon entropy for all the value of  $L$  from 50 to 5000. Different color graphs represent the Shannon entropy of four different types of species, Mammalia (Red), Aves (Yellow), Actinopterygii (Blue), and Insecta (Green).

### 256 Selection of the value of $L$

257 Shannon entropy [60] is used to measure the randomness in genomic data [66].  
 258 For different values of  $L$  (from 50 to 5000 with the difference of 50), we compute  
 259 the Shannon entropy of the drift sequence ( $\Delta$ ) of individual species.  
 260 The high value of entropy infers that for the value of  $L$ , the  $\Delta^{(L)}$  contains  
 261 high number of unique point coordinates. Fig. 3 shows that initially the  
 262 entropy of all the species increase by increasing  $L$ . At almost  $L = 800$ , the  
 263 entropy of all the species become stabilized at a high level. By increasing  
 264 the value of  $L$  after that does not change the entropy at any significant  
 265 level. From Fig. 3 it can be noted that for  $L \geq 800$ , the  $\Delta^{(L)}$  contains sig-  
 266 nificantly large number of unique point coordinates than that of  $L < 800$ .  
 267 It is also be pointed out that increasing the value of  $L$  reduces the number  
 268 of point coordinates in the corresponding  $\Delta$ . Hence, we choose the value  
 269 of  $L$  as 800.

### 270 Selection of the value of $\mathcal{F}$

271 Here we consider the feature vector for each species, say  $\chi_s$ , where  $s$  is a  
 272 species. By applying the distance metric (refer to Eq. (4)), we compute the  
 273 distances, say,  $D(\chi_{si}, \mu_i)$ , where  $\chi_{si}$  is the feature vector of the species  $s$   
 274 selected from class  $i$ , and  $\mu_i$  is the mean of the feature vector of all species  
 275 from class  $i$ . The variance of the computed distances of class  $i$ , say,  $\sigma_i^2$ ,  
 276 represents the separation of the feature vectors of intraclass species.

277 So, for  $C$  number of classes the mean of intraclass variances,

$$\mu_{intra\text{class}} = \frac{1}{C} \sum_{i=1}^C \sigma_i^2 \quad (10)$$

278 To derive the interclass distances, we consider the  $\mu$ , where,

$$\mu = \frac{1}{C} \sum_{s=1}^C \mu_i \quad (11)$$

279 By applying the distance metric (refer to Eq. (4)) we compute  $D(\mu_i, \mu)$   
280 which represents the separation of the feature vectors of interclass species.

281 So, for  $C$  number of classes the mean of interclass distance,

$$\mu_{inter\text{class}} = \frac{1}{C} \sum_{i=1}^C D(\mu_i, \mu) \quad (12)$$

282 Using this two elements we derive the discriminant score of the selected  
283 species as,

$$DS = \frac{\mu_{inter\text{class}}}{\mu_{intra\text{class}}} \quad (13)$$

284 Maximizing the  $DS$  is equivalent to getting a good separation between  
285 the feature vectors of interclass species. We apply this method for different  
286 values of  $\mathcal{F}$  (from 1 to 200) and the optimized values of  $L$ , here it is  $L \geq 800$ .  
287 It is found from Fig. 4 (a, c, and e) that for all the values of  $L$ , the value  
288 of  $DS$  increases with an increasing value of  $\mathcal{F}$ . It can be noticed that the  
289 overall value of  $DS$  is maximum for  $L = 800$ . So to select the value of  $\mathcal{F}$ ,  
290 we consider  $\widetilde{DS}$  for  $L = 800$ , where,

$$\widetilde{DS} = \frac{\mu_{inter\text{class}}}{\log \mu_{intra\text{class}}} \quad (14)$$

291 As the effect of  $\mu_{intra\text{class}}$  is scaled down in  $\widetilde{DS}$ , so  $\widetilde{DS}$  represents the  
292 effect of  $\mu_{inter\text{class}}$  on  $DS$  for the corresponding value of  $\mathcal{F}$ . It is also  
293 shown in Fig. 4 (b, d, and f) that, for  $L = 800$ , after a period the change  
294 of  $\widetilde{DS}$  becomes less than 5%. We consider that as the stable state of  $\widetilde{DS}$ .  
295 This implies that after a certain value of  $\mathcal{F}$ , the interclass distance does not  
296 increase significantly with an increasing value of  $\mathcal{F}$ . Within this *stable state*,  
297 there are some segments where the changes of  $\widetilde{DS}$  are less than 2%. We  
298 consider those as *stationary regions*. We consider the  $DS$  (obtained from  
299 Eq. (13)) of those stationary regions. We choose that value of  $\mathcal{F}$  for which  
300 the maximum value of  $DS$  lies within these stationary regions. Empirically  
301 it is tested that for that value of  $\mathcal{F}$ , GRAFree infers tree with better clades  
302 for both GFP-RY, GFP-SW, and GFP-MK. Hence, it is considered that  
303 for the particular value of  $\mathcal{F}$  the feature vector of the species represents  
304 the  $\Delta$  better for comparative genomic study. Hence we select the value of  
305  $\mathcal{F}$  as 160, 165, and 165 for  $\Delta_{RY}$ ,  $\Delta_{SW}$ , and  $\Delta_{MK}$ , respectively.

### 306 Selection of the value of $\alpha$

307 For a given  $L$  and  $\mathcal{F}$ , to choose the value of  $\alpha$  within the range of  $[0,1]$ , we  
308 consider the distance matrix and apply the same concept over the scalar  
309 values of the distance matrix to compute  $DS$  (refer to Eq. (13)). We derive  
310 the mean and variance of all pairwise distances, say,  $\mu_i$  and  $\sigma_i^2$  respectively,

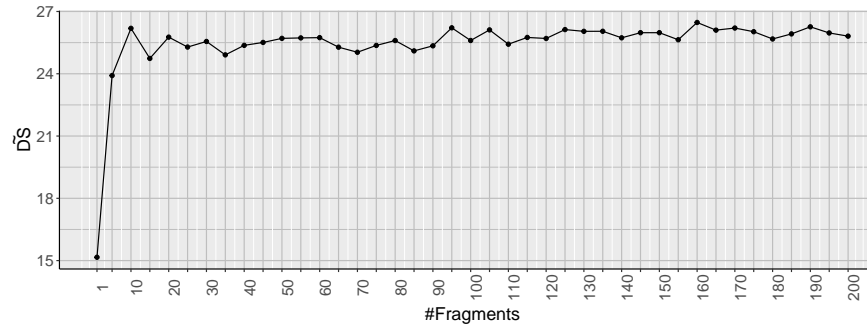

(a) For  $L = 800$  the  $\widetilde{DS}$  for  $\Delta_{RY}$

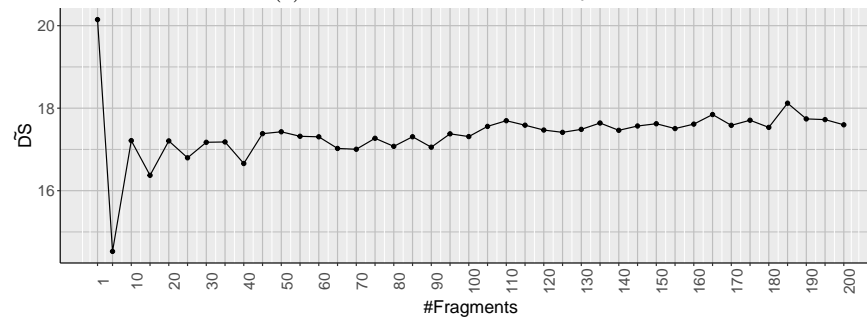

(b) For  $L = 800$  the  $\widetilde{DS}$  for  $\Delta_{SW}$

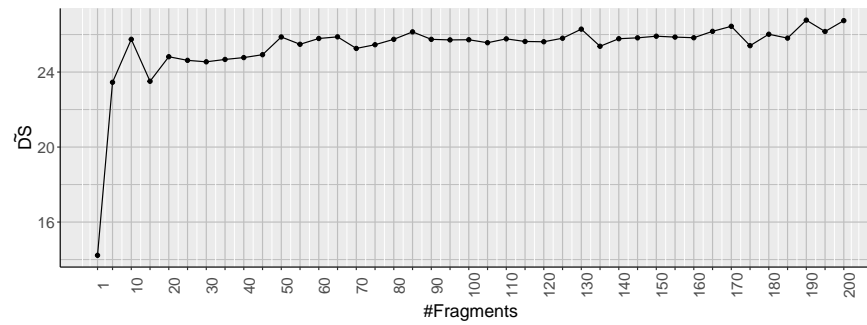

(c) For  $L = 800$  the  $\widetilde{DS}$  for  $\Delta_{MK}$

Figure 4: The *widetildeDS* for  $L = 800$  for  $\Delta_{RY}$ ,  $\Delta_{SW}$ , and  $\Delta_{MK}$ , respectively.

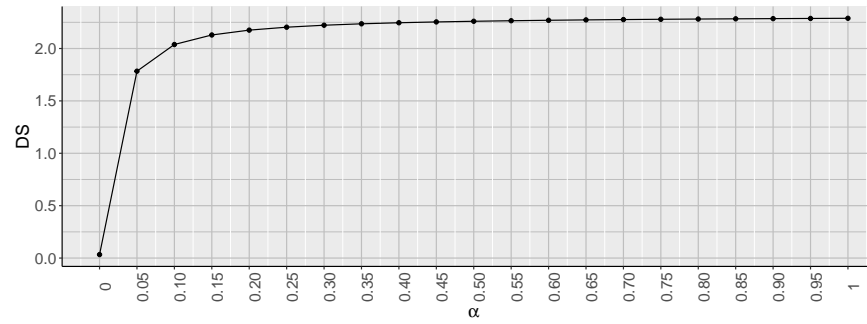

(a)  $DS$  for GFP-RY

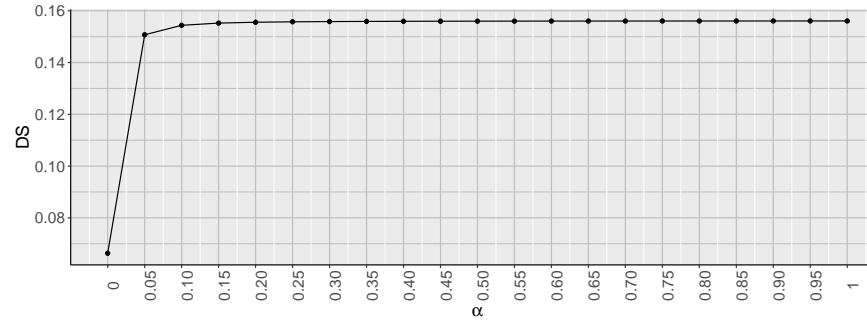

(b)  $DS$  for GFP-SW

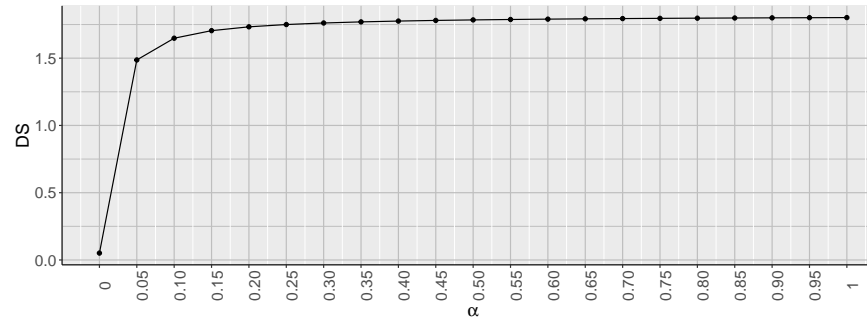

(c)  $DS$  for GFP-MK

Figure 5: The  $DS$  for all the values of  $\alpha$  from 0 to 1, given  $L = 800$  and  $\mathcal{F} = 160, 165,$  and  $165$  for GFP-RY, GFP-SW, and GFP-MK, respectively.

311 between the species of class  $i$ . Similarly, compute the  $\mu_{intra\text{class}}$  as the  
 312 mean of intraclass variances using the Eq. (10).

313 The mean of interclass distance is derived as following,

$$\mu_{interclass} = \frac{1}{C} \sum_{i=1}^C (\mu_i - \mu)^2 \quad (15)$$

314 It is also be observed that the value of  $DS$  becomes stabilized after  
 315 a period. Now we choose that value of  $\alpha$  for which the maximum value  
 316 of  $DS$  is obtained from Eq. (13) after stabilized. From Fig. 5, it can be  
 317 observed that for all the selected values of  $\mathcal{F}$  ( $=160, 165,$  and  $165$  for  $\Delta_{RY},$   
 318  $\Delta_{SW},$  and  $\Delta_{MK},$  respectively) and  $L$  ( $=800$ ), the maximum value of  $DS$   
 319 is obtained for  $\alpha=1$ .

320 Hence, we consider  $L = 800$ ,  $\mathcal{F} = 160$ , and  $\alpha = 1$  as the value of  
321 the parameters to derive the phylogenetic tree for GFP-RY. Similarly, for  
322 GFP-SW and GFP-MK, the value of  $L$ ,  $\mathcal{F}$ , and  $\alpha$  are chosen as 800, 165,  
323 1 and 800, 165, 1, respectively. It is also noted empirically that the tree  
324 inferred using these parameters accumulates most of the intraclass species  
325 within same clade.

## 326 Performance measure

327 In this study, we consider four different classes with more than 50 families  
328 of species. For measuring the accuracy of the derived tree we consider four  
329 classes, seven orders, and four families which are monophyletic and have  
330 more than ten representative species in our dataset. Our primary objective  
331 of this proposed method of performance measuring is to cluster the mono-  
332 phyletic species according to their respective class, order, or family. This  
333 is a quantitative measure of the deformation of a given monophyletic clade  
334 of phylogenetic tree. This measurement is useful especially when we do not  
335 have the reference tree to compare. The *transfer level (TransLv)* proposed  
336 here is defined as the minimum number of levels require to move a species  
337 to another target clade. The objective behind the transfer of a species to  
338 another clade is either to place the species to its appropriate clade or to re-  
339 move the species from an inaccurate clade. The *total transfer level (TTL)*  
340 of a clade is the sum of the transfer levels to make a clade correct. The  
341 proposed measure of accuracy of a clade is based on the total transfer level  
342 of the clade. Using the *TTL* we compute the proposed measure, *Deformity*  
343 *Index*, which is a quantitative measure of the deformation the clades of  
344 the tree. Hence, for the ideal case where each species is placed within the  
345 proper clade, the value of Deformity Index is zero. The computation of the  
346 Deformity Index of a clade is described in Algorithm 1.

## 347 Results and discussion

### 348 Bootstrapping

349 The conventional method of bootstrapping [17], [14] considers the aligned  
350 sequences to resample and replicate. As we are developing an alignment-  
351 free method of phylogeny construction, the conventional bootstrapping  
352 method may not be applicable for this case. The main motivation of boot-  
353 strapping is to generate the population from a single genome. It is observed  
354 that the average intraspecific genetic variation is within 1% [38], [70]. So  
355 here we propose a bootstrapping technique which considers the genetic  
356 variance of a sample space within 1%. For that we apply mutations at  
357 each location with a probability of 1% and consider an unbiased selection  
358 of the nucleotides at each location. We generate 100 replicas using this  
359 bootstrapping method and construct trees from each set of sequences us-  
360 ing GRAFree method by setting values of  $L$ ,  $\mathcal{F}$ , and  $\alpha$  as discussed in  
361 the previous section. Felsenstein's bootstrapping method [17] assesses the  
362 robustness of phylogenetic trees using the presence and absence of clades.  
363 For the large scale genomics Felsenstein's bootstrap is not efficient to sum  
364 up the replicas. For the hundreds of species this method is inclined to  
365 produce low bootstrap support [36]. So here we apply a modification of  
366 Felsenstein's bootstrapping, where the presence of a clade is quantified us-  
367 ing the transfer distance proposed in [36]. The transfer distance [10] or



---

**Algorithm 1** Algorithm for measuring the Deformity Index

---

**Input:** Tree topology

**Input:** *MonoPhyl*, is a list of all species from a monophyletic clade considered to compute the Deformity Index.

**Output:** Deformity Index of the clade of the tree

*//Compute the deformity index to place species to its appropriate clade.*

1: Find the all unique clades having maximum number of species from *MonoPhyl*, say  $C$

2: **if**  $|c| = 1, \forall c \in C$ , that means every  $c \in C$  contains single species  $s$ , where  $s \in MonoPhyl$  **then**

3:     *DeformityIndexAdd* =  $\infty$

4: **else**

5:     **for** each  $c, \forall c \in C$  **do**

6:         Derive *TransLv<sub>s</sub>* for each species  $s$ , where  $s \notin c$

7:          $TTL_c = \sum_s TransLv_s$

8:     **end for**

9: **end if**

10: *DeformityIndexAdd* =  $\frac{\min(TTL_c)}{|MonoPhyl|}$ ,

where,  $|MonoPhyl|$  = number of species in *MonoPhyl*

*//Compute the deformity index to remove the species from an inaccurate clade*

11: Find all species,  $S$ , placed under the clade of *MonoPhyl*, where  $S \notin MonoPhyl$

12: Derive *TransLv<sub>s</sub>* for each species  $s$ , where  $s \in S$

13:  $TTL = \sum_s TransLv_s$

14: *DeformityIndexRemove* =  $\frac{\min(TTL)}{|MonoPhyl|}$ ,

where,  $|MonoPhyl|$  = number of species in *MonoPhyl*

15: *DeformityIndex* =

$\min(DeformityIndexAdd_i, DeformityIndexRemove_i)$

---

368 R-distance [13] is the minimum number of changes required to transform  
369 one partition to other. We computed the occurrence of each clade using  
370 the tool BOOSTER [36].

### 371 Observations from derived phylogenetic trees

372 Here, we present phylogenetic trees generated by our proposed method,  
373 GRAFree, using the whole mitochondrial genome sequences of the selected  
374 species. We consider the value of  $L$ ,  $\mathcal{F}$ , and  $\alpha$  derived from the selection  
375 technique proposed in the previous section. It is observed in Table 2 that  
376 the average Deformity Index of GFP-RY (please refer to Eq. (1)) is lower  
377 than that of GFP-SW and GFP-MK (please refer to Eq. (2) and (3), re-  
378 spectively). These results infer that the skew (AG skew and CT skew)  
379 represented by the Eq. (1) bears the signature of genomic contents related  
380 to the evolution more precisely than that of the other skews. Hence, the  
381 skew of the genomic signature may also require careful investigation on the  
382 matter of evolutionary relationships. The  $\mathcal{T}_{RY}$ ,  $\mathcal{T}_{SW}$ , and  $\mathcal{T}_{MK}$  are shown  
383 in Fig. 6. Fig. 7 presents the final tree after merging all three cases using  
384 the COSPED-II algorithm.

385 To measure the performance of  $\mathcal{T}$ , we chose 15 monophyletic clades  
386 of four classes, seven orders, and four families. It is observed that  $\mathcal{T}$  has  
387 formed the monophyletic clades for the three major classes, mammals,  
388 fishes, and birds with minor deviations, whether insects are inferred as  
389 paraphyletic. This tree also infers insects as the oldest class among these  
390 four classes followed by birds, mammals, and fishes. Mammals and fishes  
391 are inferred as the sister clades in  $\mathcal{T}$ . The deformity index of different trees  
392 are shown in Table 2.

### 393 Observations from reference methods

394 We have examined five different existing distance measures of alignment  
395 free method for phylogenetic reconstruction, i.e. FFP [62], [63],  $D_2^*$  [59], [68],  
396 Chebyshev, Canberra, and Co-phylog [72] using the tool ACcelerated Alignment-  
397 FrEe sequence analysis (CAFE) [44] on our dataset. We measured each dis-  
398 tances with the word (k-mer) length of 10. The resultant trees are shown  
399 in Fig. 8. It is found that  $D_2^*$  and Co-phylog separate four major clades  
400 accurately (with the average deformity index of 0), Canberra separate four  
401 major clades with minor errors (with the average deformity index of 0.11)  
402 in their inferred trees whereas the other methods, FFP and Chebyshev,  
403 cannot identify the four classes as clades. The bootstrap support of the  
404 clades of the inferred tree from  $D_2^*$ , Co-phylog, and Canberra methods are  
405 also very high. The  $D_2^*$  and Co-phylog infer the tree having insects as  
406 the oldest clade followed by fishes, birds, and mammals. Mammals and  
407 birds are inferred as the sister clades in the derived trees from both  $D_2^*$   
408 and Co-phylog methods. So the it is accepted that the  $D_2^*$ , Co-phylog, and  
409 Canberra infer better clades than that of FFP and Chebyshev.

### 410 Complexity analysis

411 To compute the complexity of GRAFree, we consider  $M$  as the length of  
412 the genome sequences of two species,  $\mathcal{S}_1$  and  $\mathcal{S}_2$ , the length of the window  
413 to compute drift is  $L$ , and the number fragments of the drift is  $\mathcal{F}$ . The  
414 GRAFree consists of three major steps.

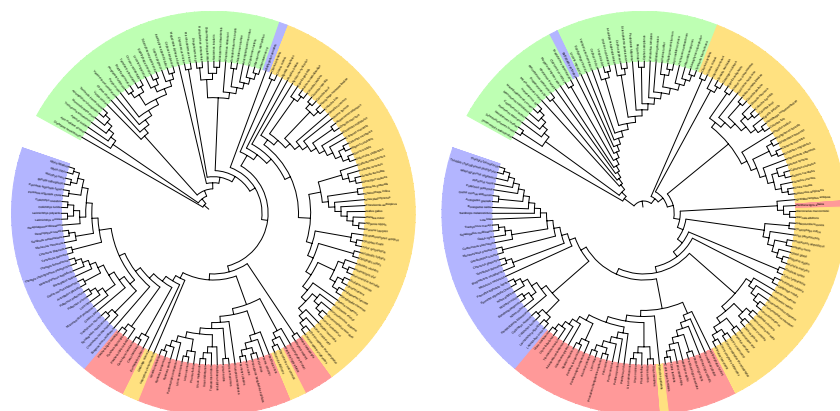

(a)  $\mathcal{T}_{RY}$ , for  $L = 800$ ,  $\mathcal{F} = 160$ , and  $\alpha = 1$  (b)  $\mathcal{T}_{SW}$ , for  $L = 800$ ,  $\mathcal{F} = 165$ , and  $\alpha = 1$

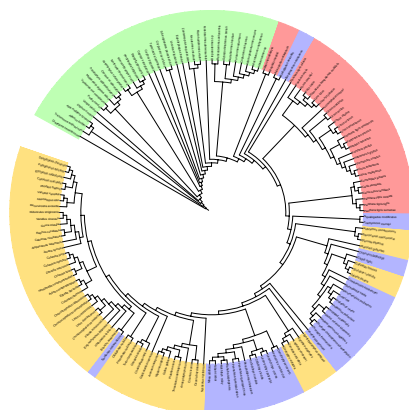

(c)  $\mathcal{T}_{MK}$ , for  $L = 800$ ,  $\mathcal{F} = 165$ , and  $\alpha = 1$

Figure 6: The inferred trees with the selected value of  $L$ ,  $\mathcal{F}$ , and  $\alpha$  for GFP-RY, GFP-SW, and GFP-MK. The mammals, fishes birds, and insects are represented by red, blue, yellow, and green, respectively.



Table 2: Deformity index for different trees

| Method                   | Class                               |                                                    |                                      |                                          |                                   |                                     |                                   |
|--------------------------|-------------------------------------|----------------------------------------------------|--------------------------------------|------------------------------------------|-----------------------------------|-------------------------------------|-----------------------------------|
|                          | Mammalia                            | Avian                                              | Fish                                 | Insecta                                  |                                   |                                     |                                   |
| GFP-RY                   | 1.87                                | 0.39                                               | 0.25                                 | 3.92                                     |                                   |                                     |                                   |
| GFP-SW                   | 2.30                                | 4.54                                               | 0.56                                 | 0.22                                     |                                   |                                     |                                   |
| GFP-MK                   | 1.57                                | 4.54                                               | 6.50                                 | 7.75                                     |                                   |                                     |                                   |
| COSPED                   | 0.50                                | 4.56                                               | 0.41                                 | 2.61                                     |                                   |                                     |                                   |
| <b>Reference Methods</b> |                                     |                                                    |                                      |                                          |                                   |                                     |                                   |
| FFP                      | 11.75                               | 12.86                                              | 12.59                                | 102.25                                   |                                   |                                     |                                   |
| Chebyshev                | 8.88                                | 24.76                                              | 14.00                                | 7.94                                     |                                   |                                     |                                   |
| Canberra                 | 0.00                                | 0.00                                               | 0.31                                 | 0.00                                     |                                   |                                     |                                   |
| $D_2^*$                  | 0.00                                | 0.00                                               | 0.00                                 | 0.00                                     |                                   |                                     |                                   |
| Co-phylog                | 0.00                                | 0.00                                               | 0.00                                 | 0.00                                     |                                   |                                     |                                   |
| Method                   | Order                               |                                                    |                                      |                                          |                                   |                                     |                                   |
|                          | Carnivora<br>(Order of<br>Mammal)   | Charadriiformes<br>(Order of<br>Bird)              | Columbiformes<br>(Order of<br>Bird)  | Gadiformes<br>(Order of<br>Fish)         | Perciformes<br>(Order of<br>Fish) | Hymenoptera<br>(Order of<br>Insect) | Blattodea<br>(Order of<br>Insect) |
| GFP-RY                   | 1.79                                | 6.89                                               | 5.96                                 | 1.16                                     | 0.25                              | 3.43                                | 3.63                              |
| GFP-SW                   | 2.10                                | 5.58                                               | 5.96                                 | 4.16                                     | 0.42                              | 1.86                                | 4.00                              |
| GFP-MK                   | 1.41                                | 9.42                                               | 5.67                                 | 2.89                                     | 0.17                              | 4.29                                | 3.00                              |
| COSPED                   | 0.38                                | 5.47                                               | 7.04                                 | 1.68                                     | 0.33                              | 2.93                                | 3.19                              |
| <b>Reference Methods</b> |                                     |                                                    |                                      |                                          |                                   |                                     |                                   |
| FFP                      | 11.63                               | 132.00                                             | 10.14                                | 12.11                                    | 74.67                             | 295.64                              | 201.38                            |
| Chebyshev                | 7.47                                | 13.80                                              | 16.43                                | 12.16                                    | 3.83                              | 8.79                                | 5.63                              |
| Canberra                 | 0.13                                | 1.75                                               | 0.00                                 | 0.47                                     | 0.00                              | 0.00                                | 3.13                              |
| $D_2^*$                  | 0.20                                | 0.00                                               | 0.00                                 | 0.11                                     | 0.00                              | 6.21                                | 2.50                              |
| Co-phylog                | 0.07                                | 1.75                                               | 0.00                                 | 0.11                                     | 0.00                              | 0.00                                | 0.31                              |
| Method                   | Family                              |                                                    |                                      |                                          |                                   |                                     |                                   |
|                          | Felidae<br>(Family of<br>Carnivora) | Threskiornithidae<br>(Family of<br>Pelecaniformes) | Gadidae<br>(Family of<br>Gadiformes) | Sciaenidae<br>(Family of<br>Perciformes) |                                   |                                     |                                   |
| GFP-RY                   | 4.21                                | 43.50                                              | 0.40                                 | 0.73                                     |                                   |                                     |                                   |
| GFP-SW                   | 3.43                                | 3.75                                               | 1.00                                 | 2.09                                     |                                   |                                     |                                   |
| GFP-MK                   | 3.29                                | 3.75                                               | 1.70                                 | 0.45                                     |                                   |                                     |                                   |
| COSPED                   | 3.43                                | 3.50                                               | 0.40                                 | 1.91                                     |                                   |                                     |                                   |
| <b>Reference Methods</b> |                                     |                                                    |                                      |                                          |                                   |                                     |                                   |
| FFP                      | 10.14                               | 276.50                                             | 11.00                                | 82.45                                    |                                   |                                     |                                   |
| Chebyshev                | 3.14                                | 649.00                                             | 4.30                                 | 4.09                                     |                                   |                                     |                                   |
| Canberra                 | 0.29                                | 0.00                                               | 0.00                                 | 0.00                                     |                                   |                                     |                                   |
| $D_2^*$                  | 0.86                                | 0.00                                               | 0.00                                 | 0.00                                     |                                   |                                     |                                   |
| Co-phylog                | 0.29                                | 0.00                                               | 0.00                                 | 0.00                                     |                                   |                                     |                                   |

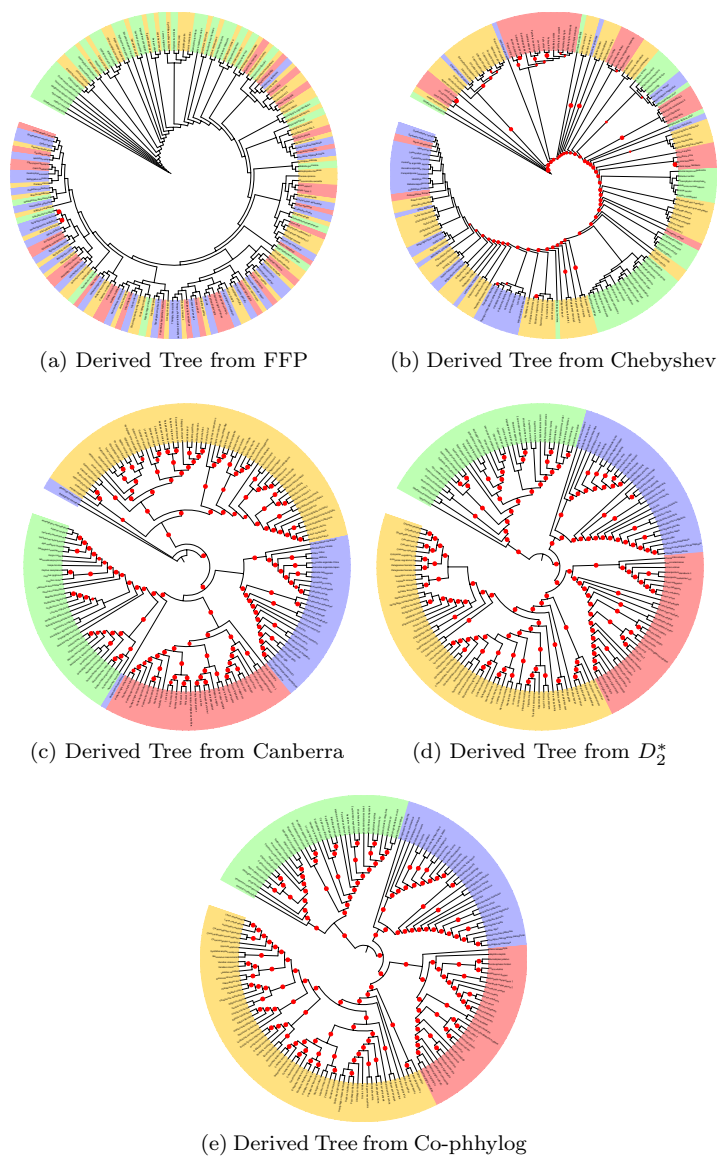

Figure 8: Derived tree from the reference methods. The mammals, fishes, birds, and insects are represented by red, blue, yellow, and green, respectively. The clades having the bootstrap scores more than 75% are denoted by the red dots on the branch.

#### 415 **Computing drift**

416 As drift is computed considering two point coordinates on the GFP, so for  
417 each species the time complexity to compute drift is  $\mathcal{O}(M - L + 1)$ . The  
418 drift sequence contains the 2D coordinate of total  $M - L + 1$  points. So the  
419 space complexity of drift sequence of a species should be  $\mathcal{O}(M - L + 1)$ .

#### 420 **Computing feature vector**

421 Each fragment of the drift is represented by  $\mu$ ,  $\Lambda$ ,  $\lambda$ , and  $\theta$  (please refer  
422 to Subsection 1). The time complexity of  $\Lambda$  and  $\lambda$  are depending on the  
423 covariance matrix of drift. Since, we consider the 2D coordinate points  
424 in drift, the time complexity of computing  $\Lambda$  and  $\lambda$  for each species is  
425  $\mathcal{O}(M - L + 1)$ . Time complexity of computing  $\mu$  and  $\theta$  are linearly related to  
426 the length of drift sequence. Hence, for each species the time complexity of  
427 computing the feature vector for  $\mathcal{F}$  number of fragments is  $\mathcal{O}((M - L + 1)\mathcal{F})$ .  
428 Similarly, the space complexity of feature vector for each species is  $\mathcal{O}(\mathcal{F})$ .

#### 429 **Computing distance between a pair of species**

430 GRAFree considers the distance function which computes the distances for  
431 all  $\mathcal{F}$  number of fragments in a constant time, means  $\mathcal{O}(1)$ . So the time  
432 complexity of computing distance between a pair of species is  $\mathcal{O}(\mathcal{F})$ .

433 Hence, both time and space complexity of GRAFree is  $\mathcal{O}(M - L + 1)\mathcal{F}$ .

#### 434 **Complexity analysis of FFP**

435 FFP considers the frequencies of all k-mers. For the  $M$  length of sequence,  
436 the time complexity to compute the feature frequency of all k-mers is  
437  $\mathcal{O}(k(M - k + 1))$ . FFP uses Jensen-Shannon Divergence (JSD) for comput-  
438 ing the distance between two feature frequency profiles. As JSD consider  
439 the entropy for deriving the distance, hence for  $(M - k + 1)$  length of se-  
440 quences the time complexity for computing the JSD is  $\mathcal{O}((M - k + 1)^2)$ .  
441 So the total time complexity of FFP for computing distance between two  
442 sequences is  $\mathcal{O}(M(M - k + 1))$ . Since, FFP considers all k-mers to compute  
443 the feature frequency profile of the sequence, the total space complexity  
444 for nucleotide is not more than  $4^k$ . Hence, the space complexity of FFP  
445 for two sequences is  $\mathcal{O}(4^k)$ .

#### 446 **Complexity analysis of Chebyshev**

447 Chebyshev distance function considers the number of occurrences k-mers  
448 in the sequences. So for  $M$  length of sequences, the time complexity of  
449 computing the occurrence of a particular k-mers is  $\mathcal{O}(k(M - k + 1))$ . The  
450 maximum among the absolute value of the difference between each k-mers  
451 of two sequences is considered as the Chebyshev distance. So the time  
452 complexity of Chebyshev for computing the distance between two sequences  
453 is  $\mathcal{O}(4^k)$ . Since, Chebyshev considers the occurrence of all k-mers, the space  
454 complexity of Chebyshev for two sequences is  $\mathcal{O}(4^k)$ .

#### 455 **Complexity analysis of Canberra**

456 Similar to the Chebyshev, Canberra distance function also considers the  
457 number of occurrences of k-mers in the sequences. Hence, the time com-  
458 plexity to compute the occurrence k-mers is  $\mathcal{O}(k(M - k + 1))$ . Canberra

Table 3: Time and space complexity to compute distance between two sequences by different methods

| Methods        | Time Complexity               |                                       | Space Complexity           |
|----------------|-------------------------------|---------------------------------------|----------------------------|
|                | Deriving features             | Computing distance                    |                            |
| GRAFree        | $\mathcal{O}(M - L + 1)$      | $\mathcal{O}((M - L + 1)\mathcal{F})$ | $\mathcal{O}(\mathcal{F})$ |
| FFP            | $\mathcal{O}(k(M - k + 1))$   | $\mathcal{O}((M - k + 1)^2)$          | $\mathcal{O}(4^k)$         |
| Chebyshev      | $\mathcal{O}(k(M - k + 1))$   | $\mathcal{O}(4^k)$                    | $\mathcal{O}(4^k)$         |
| Canberra       | $\mathcal{O}(k(M - k + 1))$   | $\mathcal{O}(4^k)$                    | $\mathcal{O}(4^k)$         |
| $D_2^*$        | $\mathcal{O}(k^2(M - k + 1))$ | $\mathcal{O}(4^k)$                    | $\mathcal{O}(4^k)$         |
| Co-phylog [72] | $\mathcal{O}(M)$              | $\mathcal{O}(M)$                      | $\mathcal{O}(kM)$          |

459 distance is considered as the summation of the ratio between the absolute  
 460 value of the difference between each k-mer and the total occurrence  
 461 of that particular k-mer within two sequences. Hence, the time complex-  
 462 ity for computing the Canberra distance between two sequences is  $\mathcal{O}(4^k)$ .  
 463 Similarly the space complexity of Canberra for two sequences is  $\mathcal{O}(4^k)$ .

#### 464 Complexity analysis of $D_2^*$

465 Similar to the FFP,  $D_2^*$  considers occurrence of k-mers in the sequences. So  
 466 for  $M$  length of sequences, the time complexity of computing the occurrence  
 467 of a particular k-mers is  $\mathcal{O}(k(M - k + 1))$ .  $D_2^*$  takes the probability of the  
 468 k-mers within the combined sequence of the two sequences. For combined  
 469 sequence of  $2M$  length, the time complexity of computing the probability  
 470 of each k-mer is  $\mathcal{O}(k)$ . Using these two values,  $D_2^*$  computes the distance  
 471 for the particular k-mer. Finally, the sum of the distances for all k-mers  
 472 is considered as the distance between two sequences. Hence, the time  
 473 complexity of  $D_2^*$  for computing the distance between two sequences is  
 474  $\mathcal{O}(kM4^k)$ . As it stores the occurrence of all k-mers, the space complexity  
 475 is  $\mathcal{O}(4^k)$ .

476 For the large scale genomic study the time and space complexities are  
 477 one of the important things to be remembered. We compare the time  
 478 and space complexity of GRAFree with some of the existing methods in  
 479 Table 3. It can be observed that GRAFree is significantly efficient than all  
 480 the selected existing methods in order of the time and space complexity.  
 481 It is noted that  $D_2^*$  and Co-phylog are efficient in quality of reconstruction  
 482 of tree. The execution time of different methods are shown in Fig. 9.

## 483 Conclusion

484 We have proposed a  $5\mathcal{F}$ -dimensional feature space and a new metric for  
 485 capturing evolutionary relationship using large scale genomic features in  
 486 the method GRAFree. GRAFree uses the graphical representation of the  
 487 genome. In this study we have selected three very naive graphical repre-  
 488 sentations of a genome considering residues independently. We have also  
 489 proposed a novel measure to evaluate the performance of the techniques.  
 490 The resultant tree accumulates most of the monophyletic clades with mi-  
 491 nor deviations. In spite of these limitations, we could observe presence of  
 492 evolutionary traits in the proposed feature descriptor extracted from the  
 493 whole mitochondrial sequences. The tree has a high bootstrap support  
 494 for a good number of clades. These demonstrate the effectiveness of the



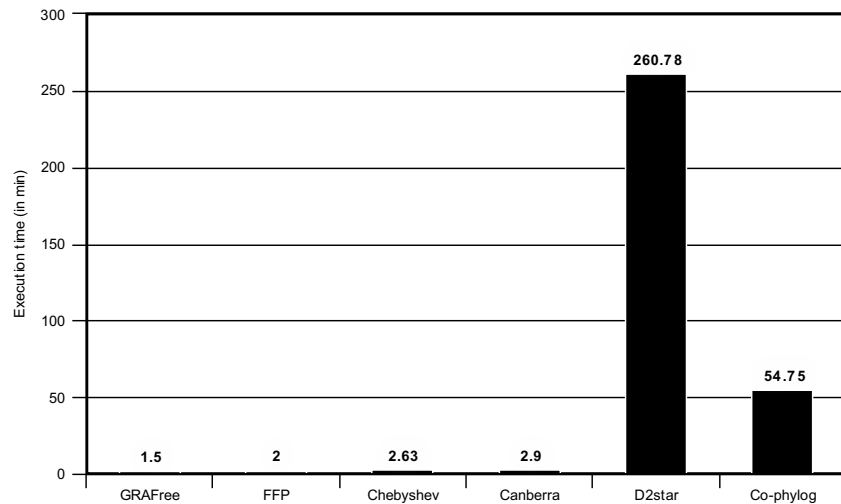

Figure 9: The execution time for different methods. All the methods are executed in the same system. The configuration of the system is 16GB RAM, Intel Core i5 processor, and it had 64 bit Ubuntu 17.10

495 proposed feature representation, as well as the metric for measuring the  
496 pairwise distances of species.

## 497 References

- 498 [1] J. S. Almeida. Sequence analysis by iterated maps, a review. *Briefings*  
499 *in Bioinformatics*, 15(3):369–375, 2013.
- 500 [2] M. Bernt, A. Braband, B. Schierwater, and P. F. Stadler. Genetic  
501 aspects of mitochondrial genome evolution. *Molecular Phylogenetics*  
502 *and Evolution*, 69(2):328–338, 2013.
- 503 [3] S. Bhattacharyya and J. Mukherjee. COSPEDTree: COuplet Su-  
504 pertree by Equivalence Partitioning of Taxa Set and DAG Formation.  
505 *IEEE/ACM Transactions on Computational Biology and Bioinformat-*  
506 *ics*, 12(3):590–603, May 2015.
- 507 [4] S. Bhattacharyya and J. Mukhopadhyay. COSPEDTree-II: Improved  
508 Couplet Based Phylogenetic Supertree. In *International Conference*  
509 *on Bioinformatics and Biomedicine (BIBM)*, Shenzhen, China, 2016.  
510 IEEE.
- 511 [5] C. E. Bird, S. A. Karl, P. E. Smouse, and R. J. Toonen. Detecting  
512 and measuring genetic differentiation. *Phylogeography and Population*  
513 *Genetics in Crustacea*, 19(3), 2011.
- 514 [6] M. Blanchette, G. Bourque, and D. Sankoff. Breakpoint phylogenies.  
515 *Genome Informatics*, pages 25–34, 1997.
- 516 [7] G. Bourque and P. A. Pevzner. Genome-Scale Evolution: Recon-  
517 structing Gene Orders in the Ancestral Species. *Genome Research*,  
518 12:26–36, 2002.

- 519 [8] S. L. Cameron, N. Lo, T. Bourguignon, G. J. Svenson, and T. A.  
520 Evans. A mitochondrial genome phylogeny of termites (Blattodea:  
521 Termitoidea): Robust support for interfamilial relationships and  
522 molecular synapomorphies define major clades. *Molecular Phyloge-*  
523 *netics and Evolution*, 65(1):163–173, 2012.
- 524 [9] Z. Cao, B. Liao, and R. Li. A group of 3D graphical representation of  
525 DNA sequences based on dual nucleotides. *International Journal of*  
526 *Quantum Chemistry*, 108(9):1485–1490, 2008.
- 527 [10] I. Charon, L. Denoeud, A. Guénoche, and O. Hudry. Maximum trans-  
528 fer distance between partitions. *Journal of Classification*, 23(1):103–  
529 121, 2006.
- 530 [11] R. Chi and K. Ding. Novel 4D numerical representation of DNA  
531 sequences. *Chemical Physics Letters*, 407(1-3):63–67, 2005.
- 532 [12] J. M. Cummins, T. Wakayama, and R. Yanagimachi. Fate of mi-  
533 croinjected spermatid mitochondria in the mouse oocyte and embryo.  
534 *Zygote*, 5(4):301308, 1997.
- 535 [13] W. H. Day. The complexity of computing metric distances between  
536 partitions. *Mathematical Social Sciences*, 1(3):269–287, 1981.
- 537 [14] B. Efron, E. Halloran, and S. Holmes. Bootstrap confidence levels for  
538 phylogenetic trees. *Proceedings of the National Academy of Sciences*  
539 *(PNAS)*, 93(23):13429–13434, 1996.
- 540 [15] C. F. Ehret and G. D. Haller. Origin, development, and maturation  
541 of organelles and organelle systems of the cell surface in *Paramecium*.  
542 *Journal of Ultrastructure Research*, 9:1–42, 1963.
- 543 [16] A. Eyre-Walker and P. Awadalla. Does human mtDNA recombine?  
544 *Journal of Molecular Evolution*, 53(4):430–435, 2001.
- 545 [17] J. Felsenstein. Confidence Limits on Phylogenies: An Approach Using  
546 the Bootstrap. *Evolution*, 39(4):783–791, 1985.
- 547 [18] J. Felsenstein. *Inferring phylogenies*. Sinauer Associates, 2003.
- 548 [19] T. L. Fulton, S. M. Wagner, C. Fisher, and B. Shapiro. Nuclear DNA  
549 from the extinct Passenger Pigeon (*Ectopistes migratorius*) confirms  
550 a single origin of New World pigeons. *Annals of Anatomy - Anatomis-*  
551 *cher Anzeiger*, 194(1):52–57, 2012. Special Issue: Ancient DNA.
- 552 [20] Y. Gao and L. Luo. Genome-based phylogeny of dsDNA viruses by a  
553 novel alignment-free method. *Gene*, 492(1):309–314, 2012.
- 554 [21] M. Gates. A Simple Way To Look at DNA. *Journal of Theoretical*  
555 *Biology*, 119(3):319–328, 1986.
- 556 [22] C. Gissi, F. Iannelli, and G. Pesole. Evolution of the mitochondrial  
557 genome of metazoa as exemplified by comparison of congeneric species.  
558 *Heredity*, 101(4):301, 2008.
- 559 [23] K. Hatje and M. Kollmar. A phylogenetic analysis of the brassicales  
560 clade based on an alignment-free sequence comparison method. *Frontiers in Plant Science*, 3:192, 2012.  
561

- 562 [24] B. Haubold, P. Pfaffelhuber, M. Domazet-Lošo, and T. Wiehe. Esti-  
563 mating mutation distances from unaligned genomes. *Journal of Com-  
564 putational Biology*, 16(10):1487–1500, 2009.
- 565 [25] Y. Huang and T. Wang. Phylogenetic analysis of DNA sequences  
566 with a novel characteristic vector. *Journal of Mathematical Chemistry*,  
567 49(8):1479–1492, 2011.
- 568 [26] Y. Huang and T. Wang. New graphical representation of a DNA  
569 sequence based on the ordered dinucleotides and its application to  
570 sequence analysis. *International Journal of Quantum Chemistry*,  
571 112(6):1746–1757, 2012.
- 572 [27] N. C. Jones and P. A. Pevzner. *An Introduction to Bioinformatics  
573 Algorithms (Computational Molecular Biology)*. The MIT Press, 2004.
- 574 [28] J. Joseph and R. Sasikumar. Chaos game representation for compar-  
575 ison of whole genomes. *BMC Bioinformatics*, 7(1):243, 2006.
- 576 [29] M. R. Kantorovitz, G. E. Robinson, and S. Sinha. A statistical method  
577 for alignment-free comparison of regulatory sequences. *Bioinformatics*,  
578 23(13):i249, 2007.
- 579 [30] P. Kolekar, M. Kale, and U. Kulkarni-Kale. Alignment-free distance  
580 measure based on return time distribution for sequence analysis: ap-  
581 plications to clustering, molecular phylogeny and subtyping. *Molecular  
582 Phylogenetics and Evolution*, 65(2):510–522, 2012.
- 583 [31] V. Kumar, F. Lammers, T. Bidon, M. Pfenninger, L. Kolter, M. A.  
584 Nilsson, and A. Janke. The evolutionary history of bears is character-  
585 ized by gene flow across species. *Scientific Reports*, 7:46487, 2017.
- 586 [32] T. Kuramoto, H. Nishihara, M. Watanabe, and N. Okada. Deter-  
587 mining the Position of Storks on the Phylogenetic Tree of Waterbirds  
588 by Retroposon Insertion Analysis. *Genome Biology and Evolution*,  
589 7(12):3180–3189, 2015.
- 590 [33] B. F. Lang, M. W. Gray, and G. Burger. Mitochondrial genome  
591 evolution and the origin of eukaryotes. *Annual Review of Genetics*,  
592 33(1):351–397, 1999.
- 593 [34] M. G. I. Langille, W. W. L. Hsiao, and F. S. L. Brinkman. Detect-  
594 ing genomic islands using bioinformatics approaches. *Nature Reviews  
595 Microbiology*, 8(5):373–382, 2010.
- 596 [35] C.-A. Leimeister and B. Morgenstern. Kmacs: the k-mismatch average  
597 common substring approach to alignment-free sequence comparison.  
598 *Bioinformatics*, 30(14):2000–2008, 2014.
- 599 [36] F. Lemoine, J.-B. D. Entfellner, E. Wilkinson, D. Correia, M. D. Fe-  
600 lipe, T. Oliveira, and O. Gascuel. Renewing Felsensteins phylogenetic  
601 bootstrap in the era of big data. *Nature*, page 1, 2018.
- 602 [37] P. Leong and S. Morgenthaler. Random walk and gap plots of DNA  
603 sequences. *Bioinformatics*, 11(5):503–507, 1995.
- 604 [38] S. Levy et al. The Diploid Genome Sequence of an Individual Human.  
605 *PLOS Biology*, 5(10):1–32, 09 2007.

- 606 [39] B. Liao and K. Ding. A 3D graphical representation of DNA sequences  
607 and its application. *Theoretical Computer Science*, 358(1):56–64, 2006.
- 608 [40] B. Liao, R. Li, W. Zhu, and X. Xiang. On the Similarity of DNA  
609 Primary Sequences Based on 5-D Representation. *Journal of Mathe-*  
610 *matical Chemistry*, 42(1):47–57, 2007.
- 611 [41] B. Liao and T.-m. Wang. Analysis of Similarity/Dissimilarity of DNA  
612 Sequences Based on Nonoverlapping Triplets of Nucleotide Bases.  
613 *Journal of Chemical Information and Computer Sciences*, 44(5):1666–  
614 1670, 2004.
- 615 [42] B. Liao, Y. Zhang, K. Ding, and T. ming Wang. Analysis of sim-  
616 ilarity/dissimilarity of DNA sequences based on a condensed curve  
617 representation. *Journal of Molecular Structure: THEOCHEM*, 717(1-  
618 3):199–203, 2005.
- 619 [43] L. Liu, D. K. Pearl, R. T. Brumfield, and S. V. Edwards. Estimating  
620 Species Trees using Multiple-Allele DNA Sequence Data. *Evolution*,  
621 62(8):468–477, 2008.
- 622 [44] Y. Y. Lu, K. Tang, J. Ren, J. A. Fuhrman, M. S. Waterman, and  
623 F. Sun. CAFE: aCcelerated Alignment-FrEe sequence analysis. *Nu-*  
624 *cleic Acids Research*, 45(W1):W554–W559, 2017.
- 625 [45] B. Moret, S. Wyman, D. Bader, T. Warnow, and M. Yan. A new  
626 implementation and detailed study of breakpoint analysis. In *Proc*  
627 *6th Pacific Symp Biocomputing*, pages 583–594. Hawaii, 2001.
- 628 [46] B. M. E. Moret. Phylogenetic Analysis of Whole Genomes. In *Bioin-*  
629 *formatics Research and Application: 7th International Symposium,*  
630 *ISBRA*, pages 4–7, Changsha, China, 2011. Springer.
- 631 [47] A. Nandy. A new graphical representation and analysis of DNA se-  
632 quence structure: I. Methodology and application to globin genes.  
633 *Current Science*, 66(4):309–314, 1994.
- 634 [48] A. Nandy, M. Harle, and S. C. Basak. Mathematical descrip-  
635 tors of DNA sequences: development and applications. *ARKIVOC*,  
636 2006(9):211–238, 2006.
- 637 [49] S. Ohno. So much ‘junk’ DNA in our genome. *Evolution in Genetic*  
638 *Systems*, 23:366–370, 1972.
- 639 [50] H. H. Otu and K. Sayood. A new sequence distance measure for phy-  
640 logenetic tree construction. *Bioinformatics*, 19(16):2122–2130, 2003.
- 641 [51] A. F. Palazzo and E. S. Lee. Non-coding RNA: what is functional and  
642 what is junk? *Frontiers in Genetics*, 6, 2015.
- 643 [52] R. Peng, B. Zeng, X. Meng, B. Yue, Z. Zhang, and F. Zou. The  
644 complete mitochondrial genome and phylogenetic analysis of the giant  
645 panda (*Ailuropoda melanoleuca*). *Gene*, 397(1):76–83, 2007.
- 646 [53] J.-M. Pons, A. Hassanin, and P.-A. Crochet. Phylogenetic relation-  
647 ships within the Laridae (Charadriiformes: Aves) inferred from mitoch-  
648 ondrial markers. *Molecular Phylogenetics and Evolution*, 37(3):686–  
649 699, 2005.

- 650 [54] R. A. Pyron. Post-molecular systematics and the future of phyloge-  
651 netics. *Trends in Ecology & Evolution*, 30(7):384–389, 2015.
- 652 [55] J. Qi, H. Luo, and B. Hao. CVTree: a phylogenetic tree recon-  
653 struction tool based on whole genomes. *Nucleic Acids Research*,  
654 32(suppl\_2):W45–W47, 2004.
- 655 [56] M. Randić, M. Novič, and D. Plavšić. Milestones in Graphi-  
656 cal Bioinformatics. *International Journal of Quantum Chemistry*,  
657 113(22):2413–2446, 2013.
- 658 [57] M. Randić, M. Vračko, A. Nandy, and S. C. Basak. On 3-D Graphi-  
659 cal Representation of DNA Primary Sequences and Their Numerical  
660 Characterization. *Journal of Chemical Information and Computer  
661 Sciences*, 14(5):1235–1244, 2000.
- 662 [58] M. Randić, M. Vračko, J. Zupan, and M. Novič. Compact 2-D graphi-  
663 cal representation of DNA. *Chemical Physics Letters*, 373(5-6):558–  
664 562, 2003.
- 665 [59] G. Reinert, D. Chew, F. Sun, and M. S. Waterman. Alignment-free  
666 sequence comparison (I): statistics and power. *Journal of Computa-  
667 tional Biology*, 16(12):1615–1634, 2009.
- 668 [60] C. E. Shannon. A mathematical theory of communication. *ACM  
669 SIGMOBILE Mobile Computing and Communications Review*, 5(1):3–  
670 55, 2001.
- 671 [61] X. Shi, P. Tian, R. Lin, D. Huang, and J. Wang. Characteriza-  
672 tion of the Complete Mitochondrial Genome Sequence of the Globose  
673 Head Whiptail *Cetonurus globiceps* (Gadiformes: Macrouridae) and  
674 Its Phylogenetic Analysis. *PLOS One*, 11(4):688–704, 2016.
- 675 [62] G. E. Sims, S.-R. Jun, G. A. Wu, and S.-H. Kim. Whole-genome phy-  
676 logeny of mammals: evolutionary information in genic and nongenic  
677 regions. *Proceedings of the National Academy of Sciences (PNAS)*,  
678 106(40):17077–17082, 2009.
- 679 [63] G. E. Sims and S.-H. Kim. Whole-genome phylogeny of *Escherichia  
680 coli/Shigella* group by feature frequency profiles (FFPs). *Proceed-  
681 ings of the National Academy of Sciences (PNAS)*, 108(20):8329–8334,  
682 2011.
- 683 [64] P. H. A. Sneath and R. R. Sokal. *Numerical Taxonomy*. W. H. Freeman  
684 and Company, San Francisco, 1973.
- 685 [65] S.-N. Song, P. Tang, S.-J. Wei, and X.-X. Chen. Comparative and phy-  
686 logenetic analysis of the mitochondrial genomes in basal hymenopter-  
687 ans. *Scientific Reports*, 6:20972, 2016.
- 688 [66] J. A. Tenreiro Machado. Shannon entropy analysis of the genome  
689 code. *Mathematical Problems in Engineering*, 2012, 2012.
- 690 [67] I. Ulitsky, D. Burstein, T. Tuller, and B. Chor. The average com-  
691 mon substring approach to phylogenomic reconstruction. *Journal of  
692 Computational Biology*, 13(2):336–350, 2006.

- 693 [68] L. Wan, G. Reinert, F. Sun, and M. S. Waterman. Alignment-free  
694 sequence comparison (II): theoretical power of comparison statistics.  
695 *Journal of Computational Biology*, 17(11):1467–1490, 2010.
- 696 [69] H. Wang, Z. Xu, L. Gao, and B. Hao. A fungal phylogeny based  
697 on 82 complete genomes using the composition vector method. *BMC*  
698 *Evolutionary Biology*, 9(1):195, 2009.
- 699 [70] J. Wang et al. The diploid genome sequence of an Asian individual.  
700 *Nature*, 456(7218):60–65, 2008.
- 701 [71] Y.-h. Yao and T.-m. Wang. A class of new 2-D graphical representation  
702 of DNA sequences and their application. *Chemical Physics Letters*,  
703 398(4-6):318–323, 2004.
- 704 [72] H. Yi and L. Jin. Co-phylog: an assembly-free phylogenomic approach  
705 for closely related organisms. *Nucleic Acids Research*, 41(7):e75–e75,  
706 2013.
- 707 [73] L. Yu, Y.-W. Li, O. A. Ryder, and Y.-P. Zhang. Analysis of complete  
708 mitochondrial genome sequences increases phylogenetic resolution of  
709 bears (Ursidae), a mammalian family that experienced rapid specia-  
710 tion. *BMC Evolutionary Biology*, 7(1):198, 2007.
- 711 [74] W. Zhang and M. Zhang. Complete mitochondrial genomes reveal  
712 phylogeny relationship and evolutionary history of the family Felidae.  
713 *Genetics and Molecular Research*, 12:3256–3262, 2013.
- 714 [75] Z. J. Zhang. DV-Curve: a novel intuitive tool for visualizing and  
715 analyzing DNA sequences. *Bioinformatics*, 25(9):1112–1117, 2009.
- 716 [76] L. Zhao, T. Gao, and W. Lu. Complete mitochondrial DNA sequence  
717 of the endangered fish (*Bahaba taipingensis*): Mitogenome character-  
718 ization and phylogenetic implications. *ZooKeys*, (546):181, 2015.
- 719 [77] A. Zieleszinski, S. Vinga, J. Almeida, and W. M. Karlowski. Alignment-  
720 free sequence comparison: benefits, applications, and tools. *Genome*  
721 *Biology*, 18(1):186, 2017.
- 722 [78] G. Zuo and B. Hao. CVTree3 web server for whole-genome-based  
723 and alignment-free prokaryotic phylogeny and taxonomy. *Genomics,*  
724 *Proteomics & Bioinformatics*, 13(5):321–331, 2015.
